1 **The HIV-1 provirus excised by a single CRISPR/Cas9 RNA guide persists in the host cell and**  
2 **may be reactivated**

3

4 Michele Lai<sup>1,2</sup>, Eyal Maori<sup>2</sup>, Paola Quaranta<sup>1</sup>, Giulia Matteoli<sup>1,2</sup>, Fabrizio Maggi<sup>1,3</sup>, Marco  
5 Sgarbanti<sup>4</sup>, Stefania Crucitta<sup>5</sup>, Simone Pacini<sup>6</sup>, Ombretta Turriziani<sup>7</sup>, Giulia Freer<sup>1</sup>, Guido  
6 Antonelli<sup>7</sup>, Jonathan L. Heeney<sup>2</sup>, Mauro Pistello<sup>1,3</sup>

7

8 <sup>1</sup> Retrovirus Center and Virology Section, Department of Translational Research and New  
9 Technologies in Medicine and Surgery, University of Pisa, Pisa, Italy; <sup>2</sup> Laboratory of Viral  
10 Zoonotics, Department of Veterinary Medicine, University of Cambridge, Cambridge, United  
11 Kingdom; <sup>3</sup> Virology Unit, Pisa University Hospital, Pisa, Italy; <sup>4</sup> National Institute of Health,  
12 Rome, Italy; <sup>5</sup> Pharmacology Unit, Department of Clinical and Experimental Medicine, University  
13 of Pisa, Italy; <sup>6</sup> Hematology Unit, Department of Clinical and Experimental Medicine, University of  
14 Pisa, Italy; <sup>7</sup> Laboratory of Virology and Pasteur Institute-Cenci Bolognetti Foundation, Department  
15 of Molecular Medicine, Sapienza University of Rome, Rome, Italy.

16

17 *Corresponding author:*

18 Mauro Pistello

19 Centro Retrovirus e Sezione Virologia; Dipartimento di Ricerca Traslationale e delle Nuove  
20 Tecnologie in Medicina e Chirurgia; Università di Pisa; Via San Zeno 37, Pisa. I-56127 Italy

21 Phone: +39 050 221 3781

22 Fax: +39 050 221 3524

23 E-mail: mauro.pistello@med.unipi.it

24 **Abstract**

25 Gene editing may be used to cut out the human immunodeficiency virus type-1 (HIV-1) provirus  
26 from the host cell genome and eradicate infection. Here, using cells acutely or latently infected by  
27 HIV and treated with long terminal repeat-targeting CRISPR/Cas9, we show that the excised HIV  
28 provirus persists for a few weeks and, by means of HIV Integrase, rearranges in circular molecules.  
29 Circularization and integration restore proviral transcriptional activity that is enhanced in the  
30 presence of exogenous Tat and Rev or tumor necrosis factor- $\alpha$ , respectively, in acutely or latently  
31 infected cells. Although confirming that gene editing is a powerful tool to eradicate HIV infection,  
32 this work highlights that, to achieve this goal, the provirus has to be cleaved in several pieces and  
33 the infected cells treated with antiviral therapy before and after editing.

34

35

36 **Keywords:** CRISPR/Cas9, Gene therapy, Endonucleases, Gene editing, HIV, Latent reservoir,  
37 Integrase, Tat, Rev, J-Lat

38

## 39 **Introduction**

40 The highly active anti-retroviral therapy (HAART) efficiently abates human immunodeficiency  
41 virus type-1 (HIV-1) replication and has transformed a deadly infection into a chronic illness.  
42 Unfortunately, HAART does not provide a cure. By stalling viral replication, HAART halts HIV  
43 spread to other cells but allows HIV to persist and reactivate at any time. Clustered regularly  
44 interspaced short palindromic repeats/Cas9 (CRISPR/Cas9), a technique that is changing paradigms  
45 and expectancies to cure genetic maladies<sup>1</sup>, holds promises to provide a cure for HIV too<sup>2</sup>.  
46 CRISPR/Cas9 cuts out the integrated HIV-1 genome (provirus) from the host cell genome<sup>3</sup> and has  
47 proved effective to eliminate, within certain limits, infection *in vitro* and *in vivo*<sup>4</sup>.  
48 The HIV long terminal repeats (LTRs) are highly conserved among HIV strains and comprise  
49 sequence domains recognized by cellular and viral proteins driving viral replication. Initial studies  
50 to eliminate HIV infection were performed using a single CRISPR/Cas9 RNA guide recognizing a  
51 sequence domain present in both LTRs of nearly all strains<sup>3</sup>. This approach, while effective at  
52 curing some infected cells, has been recently demonstrated to facilitate virus escape<sup>5,6,7</sup> through the  
53 ensuing non-homologous end joining (NHEJ) repair mechanism<sup>8</sup>. It has also been shown that  
54 CRISPR/Cas9 alone is not always sufficient to eliminate HIV infection<sup>4</sup>. At the moment, however,  
55 CRISPR/Cas9 is the most effective gene editing method to cure HIV-infected cells, it has proved  
56 safe for human cells and animal models and has, therefore, good prerequisites for clinical use<sup>9,10,11</sup>.  
57 The rationale of the present study is based on previous observations showing that most linear or  
58 circularized reverse transcribed HIV RNA genome (cDNA) produced during viral replication does  
59 not integrate<sup>12,13</sup>. Such unintegrated viral molecules are thought to either be destroyed, or aid  
60 productive infection through expression of several genes<sup>14</sup>, or have a second chance of integrating  
61 through complementation or rearrangement events<sup>15</sup>. The aim of this study is to investigate the fate  
62 of the provirus once excised from the host cell genome. To this purpose, and taking into account  
63 current difficulties to deliver multiple RNA guides per cell *in vivo*<sup>16</sup>, we used a single CRISPR/Cas9  
64 RNA guide targeting both LTRs. Experiments were conducted in human embryonic kidney 293

65 (293T) cells bearing integrated, labeled HIV molecular clones and then extended to human T-  
66 lymphoid cells actively replicating HIV-1, as occurs during acute infection, or latently infected J-lat  
67 cells, as observed in the asymptomatic phase. The results show that the excised provirus persists in  
68 the nucleus for a prolonged period of time; depending on the number of copies per cell, it closes as  
69 single or rearranged inter-molecular circular elements that can form complete LTRs again with the  
70 aid of HIV Integrase (IN), thereby reducing the efficiency of HIV eradication by gene editing. We  
71 also show that pretreatment with Raltegravir (RAL) and Efavirenz (EFV) prevents such events.  
72 Circular forms generated by inter-molecular joining exhibit functional LTRs that drive viral  
73 transcriptional activity and respond to exogenous Tat and Rev, as occurs naturally during  
74 superinfection.

75

76 **Results**

77

78 **CRISPR/Cas9 treatment efficiently excises the HIV-1 provirus and triggers non-homologous**

79 **end-joining mechanisms to repair cellular DNA breaks.** Human 293T cells were transduced with

80 NL4-3/Luc or NL4-3/GFP, two HIV-1 NL4-3 reporter lentiviral particles obtained by pseudotyping

81 with glycoprotein of the vesicular stomatitis virus (VSV-G). NL4-3/Luc is derived from pNL4-3

82 Luc.R-E- and encodes luciferase (Luc)<sup>17</sup>. NL4-3/GFP is derived from pNL4-3 ΔEnv EGFP and

83 expresses the green fluorescent protein (GFP) as Env-GFP fusion protein that is retained in the

84 endoplasmic reticulum<sup>17</sup>. The NL4-3-based constructs express their genes and GFP or Luc reporter

85 genes under the control of 5'-LTR, but they are defective of *env* and, therefore, do not produce

86 infectious particles unless *env* is provided *in trans*. The transduced cells were maintained in culture

87 for two weeks to obtain stably integrated lines. Cells were then transfected with a plasmid

88 expressing CRISPR/Cas9 and Puromycin resistance gene, and HIV-1 specific (T5) or scramble (SC)

89 guide RNAs (gRNAs). The T5 gRNA targeted a highly conserved region between TATA box and

90 NF-κB binding site in LTRs (Supplementary Information). CRISPR/Cas9-transfected cells were

91 selected using high dose Puromycin, which eliminated non-transfectants within three days of

92 treatment (data not shown) and were monitored for reduction of Luc activity. As shown in Fig. 1a,

93 in cells treated with CRISPR/Cas9 and T5 gRNA, Luc activity dropped abruptly to less than 25%

94 between day 2 and 3 after transfection and declined to nearly undetectable levels thereafter.

95 To rule out that Luc reduction was caused by cell death or arrest of cell growth as a consequence of

96 transfection, we performed a cell viability assay (WST-8) 48 h post-transfection. As shown in Fig.

97 1b, no differences were observed amongst cell populations thus demonstrating that transfection did

98 not damage cells and Luc reduction was indeed due to HIV editing.

99 To better understand how CRISPR/Cas9 editing affected HIV transcription, we transduced 293T

100 cells with NL4-3/GFP and, 2 days later, we either left them as such (NL4-3/GFP) or transfected

101 them with SC- or T5 gRNA-containing CRISPR/Cas9 and red fluorescent protein (mCherry)

102 plasmid, to follow edited cells (Fig.1c). Consistently with the Luc data, CRISPR/Cas9 treatment  
103 caused sharp reduction in GFP expression, so that the number of mCherry+/GFP+ cells dropped to  
104 about 10% four days after transfection (Fig. 1d and 1e). In addition, GFP was nearly undetectable  
105 by Western blot analysis at day 7 (Fig. 1f). No changes were observed after treatment with  
106 CRISPR/Cas9 combined with SC gRNA (Fig. 1a, b, d-f). The criteria used for target selection, T5  
107 and SC gRNA sequences, and CRISPR reaction conditions are provided in Supplementary  
108 Information.

109 To investigate if excision events had occurred and how cellular DNA repair had resolved the  
110 editing, we obtained individual clones of CRISPR/Cas9-transfected NL4-3/Luc cells, by limiting  
111 dilution five days post-CRISPR/Cas9 treatment. Amplification was performed using a semi-nested  
112 PCR with primers annealing upstream and downstream the T5 target site (Fig. 1g) and expecting an  
113 amplicon of roughly 536 base pairs (bp) as a result of mere joining of edited genomic DNA ends  
114 with no rearrangements in-between (Fig. 1g). As expected, PCR yielded amplicons of about 500 bp  
115 that were cloned and sequenced at random. As shown in Fig. 1h, most junctions were achieved by  
116 NHEJ and presented with deletions of DNA fragments of variable lengths.

117

118 **The excised HIV-1 provirus persists and circularizes in NL4-3/Luc-transduced**  
119 **CRISPR/Cas9-transfected 293T cells.** To investigate the fate of HIV-1 provirus after excision and  
120 determine whether the proviral fragments circularize, genomic DNA was extracted from NL4-  
121 3/Luc-transduced 293T cells at various days post-CRISPR/Cas9 and T5 or SC gRNA transfection  
122 and digested with an ATP-dependent DNA exonuclease to eliminate linear DNA fragments. The  
123 digested DNA was first checked for residual linear DNA by *β-globin* amplification (Fig. 2a) and  
124 then amplified for *gag* and *pol* (primer sequences available in Supplementary Information). As  
125 determined by agarose gel electrophoresis, HIV sequences were found in the exonuclease-digested  
126 DNA samples up to 14 days post-CRISPR/Cas9 T5 gRNA treatment (Fig. 2b). In contrast, no *gag*  
127 or *pol* sequences were found in the DNA samples treated with SC gRNA and digested with the

128 exonuclease (data not shown). Since PCR concatemer analysis was performed in a population of  
129 dividing cells and the concatemers were likely to be less and less during subsequent cell mitosis, it  
130 is not known whether the PCR signal disappeared because DNA molecules were eventually  
131 degraded or progressively diluted out. Anyhow, these results suggest that, upon excision, the  
132 provirus persists for at least a couple of weeks, most likely in circular or similar DNA exonuclease-  
133 resistant forms.

134 To explore such a conclusion, we repeated the above experiment with NL4-3/Luc-transduced 293T  
135 cells that were transfected with CRISPR/Cas9+T5 and then examined for the presence of circular  
136 DNA molecules. To this aim, five replicas of such cells were transduced with NL4-3/Luc,  
137 propagated for two weeks and treated with CRISPR/Cas9 and T5 gRNA (three replicas), SC gRNA  
138 (one replica), or left untreated (one replica). Cells were propagated for 10 days in the presence of  
139 Puromycin to enrich in CRISPR-transfected cells and processed to extract whole DNA. This DNA  
140 was exonuclease-digested, checked for  *$\beta$ -globin* amplification (data not shown) and subjected to  
141 rolling circle amplification (RCA) to enrich in circular DNA molecules. This technique allows  
142 selective amplification of circularized DNA as concatemers, requiring digestion with a single cutter  
143 to obtain full length fragments. Fig. 2c shows the RCA amplicons electrophoresed as such or after  
144 digestion with *EcoRI*, which cuts pNL4-3/Luc once. Upon transfection with T5 gRNA, one sample  
145 produced a smear and was not analyzed any further, while two samples contained RCA amplicons  
146 of large size that, upon *EcoRI* digestion, yielded a discrete band (Fig. 2c). Of note, this predominant  
147 band had a size compatible with full-length HIV-Luc genome. Conversely, normal 293T cells or  
148 cells transduced with NL4-3/Luc and transfected or not with CRISPR/Cas9 + SC gRNA had  
149 negligible amounts of circular DNA molecules (Fig. 2c). In all, this experiment indicates that the  
150 amount of circular HIV molecules is increased in T5 gRNA-transfected cells, possibly originating  
151 from the excised provirus. This experiment also demonstrates that the circularized provirus  
152 persisted for a prolonged period of time and, as judged by the size of *EcoRI* fragments, did not  
153 undergo large deletions.

154 To evaluate whether circularization occurred intra- or inter-molecularly, *EcoRI*-digested RCA  
155 products of approximately 11 Kb were extracted from agarose gel, divided into four replicas per  
156 fragment, diluted to 1 ng and amplified in their LTR junctions. To this aim, we designed forward  
157 (Fwd) and reverse (Rev) primers annealing to *luc/nef* and *gag* regions (Fig. 2d), respectively, and  
158 generating amplicons the size of which depended on whether circularization had occurred within a  
159 single excised provirus (intra-molecular circularization) or between two or more molecules (inter-  
160 molecular circularization). In particular, as shown in Fig. 2d, a single, circularized molecule or two  
161 HIV proviral molecules bound in sense-sense orientation would yield an amplicon of 750 bp.  
162 Conversely, two molecules bound in sense-antisense orientation would yield two amplicons. The  
163 first, obtained by extending two Fwd primers, would be 300 bp, the second, obtained with two Rev  
164 primers, would be 1200 bp (Fig. 2d). Because circular DNA generated by sense-sense inter-  
165 molecular joining has the potential to recreate full-length LTRs (Fig. 2d), we used PCR conditions  
166 privileging amplification of shorter fragments. Cells transfected with SC gRNA produced a faint  
167 band of 750 bp, as expected for a circular monomer; cells treated with T5 gRNA yielded more  
168 amplicons, two of which compatible with the estimated 750 and 300 bp (Fig. 2e). The 750-bp  
169 amplicons shown in Fig. 2e were then retrieved from agarose gel and sequenced. Most of them had  
170 In/Dels. Of note, one of them had a wild-type sequence demonstrating that intra-molecular or inter-  
171 molecular sense-sense orientation could recreate wild-type LTRs (Fig. 2f).

172  
173 **The excised HIV-1 provirus can generate concatemers through inter-molecular joining.** To  
174 further confirm that circularization of excised proviruses can also occur through binding of two or  
175 more molecules in sense-sense orientation, we devised the approach shown in Fig. 3a. Using the  
176 NL4-3/Luc backbone, to prepare VSV-G pseudotyped viral vectors, we constructed two different  
177 HIV-1 molecular clones named NL4-3/Luc/Ori and NL4-3/Luc/KanR (Fig. 3b). NL4-3/Luc/Ori  
178 contained the low copy bacterial origin of replication SC101, and NL4-3/Luc/KanR encoded the  
179 Kanamycin resistance gene. The genes were cloned in the same restriction site within  $\Delta env$  (Fig.



180 3b). This would allow to identify and select inter-molecular concatemers, which may generate *in*  
181 *vitro* after CRISPR/Cas9 excision, because inter-molecular concatemers between the two constructs  
182 (Ori+KanR) could be used as plasmids to transform bacteria that would only grow with Ori *and*  
183 KanR on Kanamycin-containing agar plates. The respective VSV-G-pseudotyped particles were  
184 first tested for competence for transduction. Both NL4-3/Luc/Ori and NL4-3/Luc/KanR particles  
185 had slightly reduced transduction capacity compared to NL4-3/Luc, but it was deemed sufficient to  
186 perform the subsequent experiments (Fig. 3c). As shown in Fig. 3a, 293T cells were co-transduced  
187 with NL4-3/Luc/Ori and NL4-3/Luc/KanR, then cultivated for two weeks to obtain stable  
188 transduction. Cells were cloned by limiting dilution and probed to select for double- positive clones.  
189 Screening was performed with an upstream primer annealing to pNL4-3 and downstream primers  
190 annealing to Ori or KanR. Ori and KanR primers were also designed to yield amplicons of about  
191 220 and 280 bp, respectively, to discriminate both clones by agarose gel electrophoresis (Fig. 3d).  
192 Double-positive cell clones were then pooled, treated with CRISPR/Cas9 and T5 gRNA, or SG  
193 gRNA, to excise both NL4-3/Luc/Ori and NL4-3/Luc/KanR, and cultivated for two weeks in the  
194 presence of Puromycin to select for CRISPR/Cas9 transfectants. Whole cellular DNA was then  
195 extracted and treated with DNA exonuclease to eliminate the linear fragments (Fig. 3a). To check if  
196 the excised NL4-3/Luc/Ori and NL4-3/Luc/KanR had formed inter-molecular concatemers, which  
197 we named NL4-3/Luc/KanR/Ori, we took advantage of *KanR*, the Kanamycin resistance gene, and  
198 SC101, the bacterial origin of replication, to select and expand inter-molecular concatemers in  
199 bacterial cells. DNA exonuclease-digested cellular DNA was thus used to transform bacterial cells  
200 which were grown in the presence of Kan (Fig. 3a). From 200 ng of cellular DNA, measured before  
201 exonuclease digestion, we obtained 30-50 bacterial colonies. Two hundred ng of cellular DNA is  
202 roughly equivalent to 28,000 cells. Considering that this amount was used to transform  $10^8$  bacterial  
203 cells with a transformation efficiency below 10% for plasmids sizing 20 Kb, we estimate that an  
204 inter-molecular concatemer was present in about 1 out to 1,000 cells.

205 Five random colonies, named *A-E*, were picked and PCR checked for sense-sense inter-molecular  
206 concatemers as by Fig. 2e, and clones a-e, clearly distinguishable in the agarose gel of Fig. 3e, were  
207 sequenced at their LTR junctions (Fig. 3f). Sequence analysis confirmed that *a-d* clones were  
208 derived from excised NL4-3/Luc/Ori and NL4-3/Luc/KanR which were bound in sense-sense  
209 orientation as shown in Fig. 3g. Clones a and b contained large deletions, and clones c and d had a  
210 single nucleotide deletion and a single mutation compared to parental NL4-3 sequence,  
211 respectively. Parallel analyses performed with CRISPR/Cas9 and SC gRNA did not yield bacterial  
212 colonies (data not shown).

213 In all, these results demonstrate that NL4-3/Luc/KanR/Ori form spontaneously upon excision of  
214 NL4-3/Luc/Ori and NL4-3/Luc/KanR proviruses and that inter-molecular, sense-sense joining  
215 rebuilds full-length LTRs.

216

217 **HIV-1 concatemers show perceptible transcriptional activity but do not lead to infectious**  
218 **particles.** To understand whether full-length LTRs in concatemers possess functional activity, 293T  
219 cells were transfected in parallel with NL4-3/Luc/KanR/Ori concatemers, pNL4-3/Luc, and pNL4-  
220 3/Luc/KanR. Three days after transfection, cells were divided in two, and one half was treated with  
221 CRISPR/Cas9 + T5 gRNA. Treated and untreated cells were cultured for five days and then  
222 analyzed for HIV *gag* mRNA expression, and for HIV proteins. Measurement of intracellular HIV  
223 *gag* mRNA was performed by real-time reverse transcriptase (RT)-PCR in three independent  
224 experiments. Compared to pNL4-3/Luc and pNL4-3/Luc/KanR, mRNA levels of NL4-  
225 3/Luc/KanR/Ori were much lower but detectable (Fig. 4a). As regards protein expression, pNL4-  
226 3/Luc/KanR and pNL4-3/Luc produced p24 levels that exceeded the highest limit of quantification  
227 of the ELISA used. These samples were therefore diluted 1:50 and retested. In all three  
228 experiments, NL4-3/Luc/KanR/Ori yielded results above the cut-off and comparable to pNL4-  
229 3/Luc/KanR and pNL4-3/Luc samples diluted 1:50. By contrast, pNL4-3/Luc/KanR cells treated  
230 with CRISPR/Cas9 + T5 gRNA produced p24 at levels below cut-off, further demonstrating deep

231 HIV-1 impairment after DNA cleavage (Fig. 4b). Western blot analysis of cell lysates, performed  
232 with anti-HIV gag and IN, showed weak production of Gag and IN, confirming minimal  
233 transcriptional activity of NL4-3/Luc/KanR/Ori (Fig. 4c). Anti-Tat antibodies demonstrated Tat  
234 expression by pNL4-3/Luc and after giving Tat in *trans*, whereas no Tat can be detected after HIV  
235 concatemer transfection.

236 To investigate whether expression of unspliced HIV-1 mRNA was accompanied and possibly  
237 driven by expression of multiply spliced HIV-1 mRNA (msRNA), we probed the cell lysates for  
238 *tat/rev* msRNA, a marker that has been shown to reflect the ability of a cell to produce virus<sup>18,19</sup>. To  
239 this aim, we used the *tat/rev* induced limiting dilution assay (TILDA), a method that discerns  
240 between latently and productively infected CD4<sup>+</sup> T-lymphocytes<sup>20</sup>. As shown in Fig. 4d, and in  
241 contrast to pNL4-3/Luc, NL4-3/Luc/KanR/Ori did not express *tat/rev* msRNA. This result and the  
242 low p24 intracellular content suggested negligible viral replication. To further investigate this  
243 matter, we repeated the experiment by co-transfecting cells with NL4-3/Luc/KanR/Ori or pNL4-3  
244 and VSV-G. At day 2 post-transfection, the supernatants were collected, assayed for the presence of  
245 RT activity, p24 and infectious particles. RT activity, tested using SYBR Green PCR-enhanced RT  
246 assay (SG-PERT)<sup>21</sup>, was negative for HIV concatemers alone (Fig. 4e, upper panel). As discussed  
247 below, provision of Tat + Rev in *trans* restored detection of RT activity in supernatants, even if at  
248 low levels (Fig. 4e, lower panel). In contrast, p24, assayed by ELISA, yielded an absorbance value  
249 slightly above the cut-off (Fig. 4f). The presence of infectious particles was examined by using  
250 these cell-free supernatants to transduce naïve 293T cells, that were then probed for the presence of  
251 NL4-3 provirus at day 3 post-transduction. This task was performed using Xpert HIV-1 Qual, a  
252 highly sensitive qualitative real-time PCR assay approved for *in vitro* diagnostics. In contrast to  
253 supernatants from cells treated with pNL4-3/Luc, which scored clearly positive (mean threshold  
254 cycle 20.2), the three replicas of NL4-3/Luc/KanR/Ori supernatants yielded weak amplification  
255 signals and reaching the threshold cycle at the 37<sup>th</sup> cycle detection (Fig. 4g). Based on information  
256 provided by the manufacturer, experience accrued by routine use of the assay and reference

257 papers<sup>22, 23</sup>, these values could not be scored as positive. These results confirm that inter-molecular  
258 concatemers are unable to produce infectious virions.

259

260 **Cells transfected with NL4-3/Luc/KanR/Ori release HIV-1 particles following addition of**

261 **exogenous HIV-1 Tat and Rev.** Prompted by previous reports showing that the HIV-1 genome

262 persists for weeks as an episome in a latent form in lymphoid and myeloid cells and can be

263 reactivated by superinfection<sup>24-27</sup>, we tested whether this may also occur with NL4-3/Luc/KanR/Ori.

264 Since superinfection of NL4-3/Luc/KanR/Ori transfectants with another HIV virus would yield

265 indistinguishable virions, 293T cells were transfected with the concatemer and, three days later,

266 transfected again with HIV *tat* or *tat + rev* plasmids to mimic superinfection. Cells were monitored

267 for intracellular HIV RNA (Fig 4a), p24 production (Fig. 4b and f) and virion release (Fig 4e) three

268 days after the second transfection. As shown in Fig. 4a, provision of *tat* or *tat + rev* boosted *gag*

269 RNA expression at levels significantly higher compared to those of cells transfected with NL4-

270 3/Luc/KanR/Ori alone. Interestingly, in all three independent experiments, *gag* mRNA values were

271 slightly higher in the presence of *tat + rev* compared to *tat* alone, suggesting that Rev, which

272 exports unspliced HIV mRNAs from nucleus to cytoplasm, facilitates *gag* transcription. As

273 expected, the presence of Rev had a more relevant boosting effect at a protein level: p24 content

274 (Fig. 4f), which increased noticeably with Tat alone, reached levels similar to NL4-3/Luc in the

275 presence of Tat and Rev. Fig 4c also shows that p55 increased proportionally in the presence of Tat

276 + Rev (Fig. 4c).

277 To ascertain whether an increment in RNA expression and protein production corresponded to

278 release of viral particles, NL4-3/Luc/Ori /KanR and *tat*- or *tat + rev*- transfected cells were further

279 transfected with VSV-G. Supernatants from treated cells were tested for RT activity by SG-PERT

280 two days later. As shown in Fig. 4e, lower panel, low but detectable RT activity in the supernatants

281 was observed suggesting that Tat + Rev, provided in *trans*, triggered release of viral particles. To

282 evaluate whether these were also infectious, supernatants (three replicas) were used to transduce

283 293T cells and these were examined for proviral DNA by Xpert HIV-1 Qual. Samples generated  
284 clearly positive amplification curves with a mean threshold cycle of 33.1 (Fig. 4g). This result  
285 indicates that 293T cells were transduced and, therefore, that the viral particles released following  
286 addition of Tat and Rev were infectious.

287

288 **HIV-1 IN activity facilitates persistence of the excised provirus in 293T cells.** IN is thought to  
289 bind the 3' ends of the linear cDNA of HIV and mediate integration of the proviral DNA in cell  
290 genome<sup>29,30</sup>. Prompted by this, we hypothesized that the excised provirus mimics linear, non-  
291 integrated double stranded HIV DNA and, as such, can be concatemerized, thereby reconstituting  
292 two complete LTRs (Fig 2d). To address this hypothesis, we set up the experiment illustrated in Fig.  
293 5a and opted to use GFP as a reporter gene. To mimic CRISPR/Cas9 cleavage, pNL-CMV-GFP,  
294 differing from pNL4.3-GFP because its heterologous protein expression is driven by the CMV  
295 promoter, was digested with *PmlI*, which has two blunt-ended cutting sites outside the HIV-1  
296 genome. After digestion, the HIV-1 genome was extracted from agarose gel. As shown in Fig. 5a,  
297 the linearized HIV-1 genome was transfected alone or together with pCMV-IN, a plasmid encoding  
298 HIV-1 IN under the control of CMV promoter. Non-transfected cells and cells transfected with  
299 uncut pNL-CMV-GFP served as negative and positive controls, respectively. Three days post-  
300 transfection, cells were examined for GFP expression by flow cytometry and fluorescence  
301 microscopy. As shown in Fig. 5c and 5d, non-transfected 293T cells showed no fluorescence,  
302 whereas nearly 50% of the cells transfected with uncut pNL-CMV-GFP were fluorescent. As  
303 regards cells transfected with the linearized HIV genome, provision of HIV-1 IN *in trans* increased  
304 the percentage of fluorescent cells that, in three independent experiments, rose from about 3% to  
305 over 20% with an increment that was statistically significant (Fig. 5c and 5d). These experiments  
306 suggest that partial rescue of transcriptional capacity is facilitated by HIV-1 IN.

307 To understand if HIV-1 IN contributes to restoration of transcriptional activity by a novel HIV  
308 genome arising from the transcription of the excised and rearranged provirus, we took advantage of

309 Alu repeated sequences interspersed in human genome to set up an HIV-1 Alu-PCR assay (Fig. 5e).  
310 Briefly, this assay employed a primer annealing to Alu and another one annealing to LTR  
311 sequences, and thus selectively amplified the HIV-1 genome integrated in Alu. The second primer  
312 contained the  $\lambda$ t sequence tag, so that this PCR could be followed by a second one using a primer  
313 annealing to the sequence tag and another to LTR and a probe to quantitate the amplicons. HIV-1  
314 Alu-PCR assay was run with DNA extracted from pNL-CMV-GFP -transfected and untransfected  
315 293T cells (positive and negative controls, respectively), and 293T cells transfected with linearized  
316 pNL-CMV-GFP and further transfected or not with pCMV-IN. As shown by Fig. 5f, treatment with  
317 pCMV-IN increased the number of integrated pNL-CMV-GFP by about 7-fold compared to  
318 untreated cells. The increment was statistically significant. This experiment was performed in the  
319 presence of high amounts of linearized HIV-1 genome and HIV-1 IN, which could have facilitated  
320 interaction between molecules. Nonetheless, this experiment suggests that HIV-1 IN plays a role in  
321 novel integration events after gene-editing.

322

323 **The CRISPR/Cas9 excised HIV provirus persists and circularizes also in T-lymphocytes.** With  
324 the aim to monitor the fate of the excised provirus in an *in vitro* model that closely mimics natural  
325 HIV infection, we repeated some experiments using Jurkat cells, a human T-lymphoid cell line,  
326 either actively producing or latently infected by HIV-1. The former was obtained by infecting cells  
327 with HIV NL4-3 strain. The latently infected cells were J-Lat cells, clone 9.2, harboring HIV-R7/E-  
328 /GFP, a full-length integrated HIV-1 genome expressing GFP. In such cells, HIV-R7/E-/GFP is  
329 present as a single copy per cell and persists in a latent phase from which it can be reawakened by  
330 treating cells with phorbol esters, tumor necrosis factor- $\alpha$  (TNF- $\alpha$ ), or exogenous Tat<sup>33</sup>. For these  
331 features, J-Lat are widely used to study HIV latency and reactivation<sup>34</sup>.

332 Due to low sensitivity of T-cells to lipofection<sup>35,36</sup>, J-Lat cells were CRISPR/Cas9 transfected using  
333 the ribonucleoprotein (RNP) nucleoporation system. For this purpose, we redesigned gRNAs to  
334 optimize efficiency of transfection. The first guide, named g1, targets the U5 region of LTR and the

335 second, g2, binds the same R site targeted by T5 gRNA. As a negative control, we also designed a  
336 non-related gRNA (SC). To monitor formation of LTR circular molecules, we used droplet digital  
337 PCR (ddPCR) as described<sup>37</sup>. Primers and probe were designed in such a way to detect *nef*-LTR  
338 junctions, i.e. LTR circle molecules (depicted as green dots in Fig. 6a), as opposed to linear excised  
339 molecules that were not amplified (grey dots). Results were obtained from cellular DNA extracted  
340 24 hours post-CRISPR/Cas9 treatment and normalized using primers and probe targeting  
341 housekeeping EIF2C1 gene (Fig. 6a).

342 Because HIV excision by CRISPR/Cas9 was conceived to cure latently infected cells and most  
343 studies were directed to target these cells<sup>3, 4, 7, 16</sup>, we first investigated the fate of the excised  
344 provirus in J-Lat cells. As shown in the timeline of Fig. 6b, J-Lat cells were first treated with TNF- $\alpha$   
345 and, after 1h, supplemented with 10  $\mu$ M RAL, an HIV IN inhibitor. An additional hour later, we  
346 performed RNP transfection and total DNA was extracted 24 h after TNF- $\alpha$  addition. Fig. 6c shows  
347 the results of a typical ddPCR experiment: basal numbers of LTR circle molecules in J-Lat and J-  
348 Lat + TNF- $\alpha$  were below 100 copies. Similar numbers were found after treatment with  
349 CRISPR/Cas9 SC gRNA and TNF- $\alpha$ . In contrast, the number of HIV circular molecules increased  
350 10-fold following TNF- $\alpha$  addition and CRISPR/Cas9 cleavage with g1 and g2 alone or in  
351 combination (Fig. 6c and d). These results show that not all gRNAs are equal. For reasons that were  
352 not addressed, the number of HIV circular molecules were consistently higher using g2, which  
353 targets the same LTR site as T5 (Fig. 6c). Interestingly, formation of LTR circle molecules upon  
354 CRISPR/Cas9 treatment occurred in the absence of TNF- $\alpha$  as well, although at a much lower  
355 concentration (Fig. 6e and f). These experiments indicate that circularization of the excised provirus  
356 also occurs in cells harboring one to very few numbers of integrated HIV genomes and  
357 circularization is enhanced by stimulating cells with TNF- $\alpha$ . The latter evidence implies other  
358 mechanisms, in addition to induction of HIV-1 transcription, that cause circularization of the

359 excised genomes<sup>32</sup> and take place in the absence of IN. These might be cellular proteins involved in  
360 NHEJ pathway.

361

362 **HIV IN helps reactivation of the HIV provirus in J-Lat cells.** The observation that addition of  
363 TNF- $\alpha$  and editing promotes LTR circle molecule formation, together with our own findings (Fig 5)  
364 led us to hypothesize that the inhibition of IN might enhance CRISPR-Cas9 mediated eradication.  
365 To probe this idea, J-Lat cells, pretreated or not with 10  $\mu$ M RAL for 24h, were then transfected  
366 with RNP with g1, g2, g1+g2 or the SC control guide labelled with Atto550. This dye allows  
367 tracking of RNP-transfected cells that appear fluorescently labeled in red. Five hours post-RNP  
368 treatment, HIV-1 transcription, and associated GFP expression, was induced by TNF- $\alpha$ , while  
369 keeping cells under RAL treatment. HIV reactivation was quantified in edited cells by enumerating  
370 GFP<sup>+</sup>Atto550<sup>+</sup> cells by flow cytometry, performed 24 hours post-RNP treatment (Fig. 7a). Non-  
371 transfected, non-activated J-Lat cells had no red fluorescence and traces of GFP fluorescence (<1%,  
372 Fig. 7b, grey overlay histogram in every panel). TNF- $\alpha$  induction caused GFP<sup>+</sup> cells to increase to  
373 61.2% (Fig. 7b, dot plot, top panel). SC gRNA treatment did not affect HIV activation, as cells were  
374 nearly 70% GFP<sup>+</sup> (Fig.7c, grey bar). Treatment with g1 or g2 reduced HIV activation by TNF- $\alpha$  to  
375 40% (Fig. 7c, red bar) and 56% (Fig. 7c, blue bar) GFP<sup>+</sup> cells, respectively. Again, we show that  
376 multiple targeting of LTRs has a stronger effect in reducing HIV activation compared to single  
377 targeting, since g1 + g2 proved to reduce GFP<sup>+</sup> cells to 30% (Fig. 7c, green bar). A substantial  
378 percentage of cells were still GFP<sup>+</sup> after RNP transfection. As shown in Fig. 7b and 7c, pretreatment  
379 with RAL reduced GFP expression over 10 times compared to RAL-untreated counterparts. Indeed,  
380 compared to 60% GFP<sup>+</sup> cells observed in cell populations treated with SC gRNA and RAL, after  
381 treatment with g2, g1 and g1+g2, reduction was 91.7, 71.5 and 96%, respectively.  
382 These findings confirm the previous results on 293T cells, by demonstrating that IN plays a crucial  
383 role in relapse of viral transcription of gene editing in lymphocytes as well.



384

385 **IN and reverse transcriptase (RT) inhibition are essential for a more complete clearance of**

386 **HIV-1 provirus.** To test whether novel viral DNA could integrate in cellular genome in J-Lat cells

387 after editing, we extracted J-Lat genomic DNA 24 h post-RNP treatment and probed it by Alu-PCR

388 as described in Fig. 5e. Alu-LTR amplification was chosen so as to not amplify the single provirus

389 integrated in J-Lat 9.2 cells, which has been mapped far from Alu sequences, i.e. within PP5 gene,

390 chromosome 19, by two independent studies<sup>39, 40</sup>. Alu-PCR, therefore, did not amplify the original

391 provirus but rather those that integrated back close to an Alu region. As shown in Fig. 8a, no

392 integration in Alu was detected in latent J-Lat or J-Lat treated with any gRNA. Conversely, HIV

393 activation by TNF- $\alpha$  increased the number of Alu-LTR elements, while integration was greatly

394 reduced by RAL. This preliminary experiment shows that J-Lat cells are a suitable model to

395 investigate integration by Alu-PCR.

396 We therefore proceeded with the strategy exposed in Fig. 8b: briefly, cells activated for 24 h with

397 TNF- $\alpha$  were treated with RAL or EFV, an HIV-1 RT inhibitor, for 24 h. RNP transfection with g2

398 was then carried out and, an additional 24h later, genomic DNA was extracted. Alu-LTR circles

399 were determined after normalization with  $\beta$ -globin DNA content. Fig. 8c shows that: i) RAL

400 inhibits integration in Alu more than EFV; ii) Combined treatment of RAL+EFV is more efficient

401 than the single drugs alone in preventing integration; iii) most importantly, transfection with g2

402 alone dramatically reduces Alu integration in the presence of RAL/EFV. More detailed analysis of

403 the differences among the g2-RNP transfected groups revealed that there is highly significant

404 difference between the integration events occurring with or without associated drug administration,

405 where RAL+EFV almost abolished reintegration in Alu.

406 These data show that RT and IN play important roles in the number of HIV-1 proviral genomes

407 integrated in Alu. Using both RAL and EFV after RNP transfection improved efficacy of HIV

408 clearance.

409

410 **The CRISPR/Cas9 excised HIV-1 provirus circularizes and accumulates also in acutely wt**  
411 **HIV-1-infected lymphocytes.** To assess whether cells acutely infected by wt HIV-1 accumulated  
412 circular HIV-1 genomes after editing, we repeated the study in Jurkat cells infected with a clinical  
413 isolate of HIV-1 at 0,05 MOI (Fig. 9a). Infected cells were treated with RAL and/or EFV for 7 days,  
414 then, CRISPR/Cas9 transfected using the same conditions described for J-Lat experiments. Two  
415 days after RNP transfection, we harvested culture supernatants and extracted total cellular DNA.  
416 Supernatants were examined for HIV genome content to determine reduction in viral replication  
417 following CRISPR/Cas9 treatment alone or supported by antiviral drugs. To evaluate whether  
418 CRISPR/Cas9 treatment increased the number of HIV-1 LTR circles in a model closely resembling  
419 natural HIV infection, cellular DNA was analyzed by ddPCR. As shown by Figures 9b and 9c,  
420 CRISPR/Cas9 transfection doubled the number of LTR circles in the absence of drugs (from 27.4 to  
421 52.5 copies/ $\mu$ l). Similarly, the number of LTR circles was significantly higher upon CRISPR/Cas9  
422 treatment in the presence of EFV, but not for RAL that was confirmed to decrease the number of  
423 circles. Interestingly, such increments, as well as absolute numbers of circle molecules, were much  
424 lower in the presence of both RAL + EFV, suggesting a synergistic effect (Fig. 9c and 9d). These  
425 findings recapitulate perfectly what observed with latently infected cells. Another striking similarity  
426 between acutely and latently infected cells is that RAL decreased the amount of LTR circles after  
427 HIV-1 ablation more than EFV, the RT inhibitor.

428 Finally, we measured the change in viral load in time in supernatants from cells treated with  
429 antiviral drugs and CRISPR/Cas9. As shown in Fig. 9d and 9e, the combination of antiviral drugs  
430 and CRISPR/Cas9 transfection performed at d9 after infection reduced HIV viral load by 3 logs.  
431 This finding confirms the antiviral potential of CRISPR/Cas9 when associated with pre- and post-  
432 treatment with antiretroviral drugs.

433

## 434 Discussion

435 CRISPR technology is becoming the leading gene editing tool, with increasingly expanding fields  
436 of application<sup>11, 41</sup>. These include HIV therapy, where CRISPR might allow excision of the  
437 integrated HIV genome, which can be excised from cellular DNA by taking advantage of  
438 CRISPR/Cas9 site-specific cleavage<sup>42, 43</sup>. The ends of cellular DNA are then joined by NHEJ<sup>8</sup>. This  
439 approach has proven to be effective and potent *in vitro*, whereas a number of limitations may be  
440 relevant when it is transposed *in vivo*. CRISPR/Cas9 may exhibit possible off-target activity and  
441 defiant gene rearrangement following DNA repair<sup>41, 44</sup>; moreover, diversity and mutations of HIV  
442 genome may constrain target selection<sup>45-47</sup>. Lastly, site of integration and transcriptional activity of  
443 the provirus may impact on susceptibility to CRISPR cleavage<sup>47-50</sup>. *In vivo*, this scenario is further  
444 complicated by the lack of effective delivery vehicles<sup>16</sup>.

445 The main aim of this study was to monitor the fate of the HIV-1 provirus once it is excised, and the  
446 cellular repair mechanisms are triggered to heal the scars generated by CRISPR/Cas9. To this  
447 purpose, the experimental design was structured in two main parts. First, starting from previous  
448 observations showing that the HIV-1 provirus can be excised from 293T cell genome as in  
449 lymphoid T-cells<sup>19, 20</sup>, the fate of HIV-1 provirus was first studied in 293T transduced with a  
450 replication-deficient HIV-1-based vector. Second, findings were confirmed in a human T-  
451 lymphocyte cell line that contains one copy of integrated HIV-1 per cell and is a well-established  
452 model to study latency and reactivation<sup>34, 35, 50</sup>. Third, further confirmation was achieved in  
453 lymphoid cells infected with a clinical isolate of HIV-1.

454 One of the difficulties of CRISPR strategies is the control of the type of editing in cells and of the  
455 ensuing NHEJ process. Targeting the HIV-1 LTR alone, although allowing use of a single guide to  
456 cut out the provirus, has been repeatedly shown to rapidly lead to viral escape<sup>5, 6, 7</sup>. Thus, to  
457 effectively eliminate HIV infection *in vivo*, it would be advisable to convey multiple RNA guides  
458 into a single cell and ensure chopping of the provirus. Although rapid progress in CRISPR/Cas9  
459 technology<sup>41, 51</sup> and improvement of delivery strategies<sup>52, 53</sup>, will provide a way to circumvent these

460 drawbacks, current technologies of *in vivo* delivery do not allow to control the number and amounts  
461 of RNA guides introduced into single cells. We found that, if cut with a single RNA guide, the  
462 excised HIV-1 provirus persists in cells for a protracted period. Depending on the number of copies  
463 per cell, it may persist in a linear form, with partially restored expression activity, but HIV-1 can  
464 also be found. The excised linear provirus differs from the linear HIV-1 cDNA produced by RT<sup>12</sup>  
465 during viral replication *in vitro* and *in vivo* because it misses a portion of LTR at both ends.  
466 However, it may be converted into concatemeric HIV-1 cDNAs that either persist as episomes in  
467 infected cells or may be transcribed into a full viral genome that might follow the classic intasome-  
468 mediated integration pathway because, when they dimerize, they reconstitute the functional LTR<sup>54</sup>  
469 at both ends. HIV episomes are believed to be the result of abortive integration processes<sup>46, 64, 65</sup>,  
470 deletion of sequences necessary for chromosome integration, or autointegration events occurring  
471 when an HIV cDNA integrates into another cDNA molecule<sup>56</sup>. They are found *in vitro*<sup>57, 58, 59</sup> and in  
472 patients at advanced phases of the disease<sup>13, 60-63</sup>. Episomal HIV-1 genomes persist in lymphoid  
473 cells and macrophages suggesting that extrachromosomal HIV-1 and quiescent T lymphocytes are  
474 major reservoirs in infected individuals<sup>63, 64, 67</sup>. In keeping, episomal HIV-1, which also forms under  
475 antiretroviral regimens, has been postulated as a marker of ongoing *de novo* infection that may  
476 trigger viral rebound after treatment interruption<sup>25, 68</sup>.

477 Recent studies showed that episomes are neither rare nor inactive results of a dead-end process.  
478 Indeed, it has been shown that, despite the notion that integration is a prerequisite for protein  
479 expression, the HIV episome can be expressed. Expression of Tat and Nef or Tat alone by  
480 unintegrated HIV-1 activates resting T-cells and maintains persistent viral transcription in  
481 macrophages<sup>14, 67</sup>. Unintegrated HIV-1 is abundant in resting, non-proliferating CD4<sup>+</sup> T cells and  
482 yields *de novo* virus production following cytokine exposure of resting cells<sup>69</sup>. Moreover, infection  
483 by HIV-1 mutants deleted of IN generated episomes producing Gag and Env *in vitro*, although they  
484 were incapable to establish production of infectious HIV-1<sup>7, 70</sup>. Episomal DNA was found to  
485 express early gene mRNAs at a low level and, upon superinfection, it could also express late

486 genes, indicating that it has the full potential for transcription<sup>67, 70, 72</sup>. Because of its potential for  
487 transcription, the unintegrated DNA may influence viral RNA decay consequent to therapy, and  
488 even recombine with a second incoming virus, thus contributing to the generation of viral  
489 diversity<sup>26, 27, 68</sup>.

490 The results of our study support the observation that CRISPR/Cas9 gene editing is an extremely  
491 powerful technique that allows HIV excision. However, our work demonstrates that CRISPR/Cas9  
492 excised provirus persists in cells and can re-enter the replication flow. In transduced 293T cells, we  
493 found that two or more linear fragments could bind together in sense-sense orientation and express  
494 unspliced mRNA at low levels. Importantly, as described elsewhere for non-integrated HIV DNA<sup>24,</sup>  
495 <sup>67, 70, 72</sup>, this viral DNA responded to exogenous Tat and Rev. Tat alone remarkably increased the  
496 level of expression of unspliced mRNA but, when tested at a protein level, Rev made the real  
497 difference, as it significantly augmented the amount of p24 protein. Further, infectious VSV-G  
498 pseudotyped virions could be detected in these supernatants. This indicates that provision of  
499 exogenous Tat and Rev also promotes release of viral particles from HIV episomes. It might be  
500 argued that transfection of Tat and Rev, chosen to facilitate measurement of concatemer products,  
501 led to much higher protein levels compared to superinfection, and that this is a rare event *in vivo*.  
502 How rare it really is remains still poorly defined. Besides superinfection by a second strain, which is  
503 indeed rare, Geldelblom and colleagues showed that the same HIV strain can reinfect the cell, a  
504 process known as co-infection<sup>24</sup>.

505 Interestingly, the fate of excised provirus was influenced by the number of provirus copies per cell.  
506 Indeed, RT activity increased the amount of HIV-1 provirus transcribed from RNA in activated J-  
507 Lat cells, possibly raising the chances of dimer/concatemer formation and reintegration (Fig. 8).  
508 Concatemer formation reconstituting 2 functional LTRs was detected after CRISPR in 293T cells.  
509 This might be due to the fact that multiple copies of provirus are present, a condition not so rare and  
510 that has been observed *in vivo*<sup>82</sup>. For example, when HIV-1 infection spreads through virological  
511 synapses, i.e. adhesive structures between infected and uninfected cells, multiple copies of HIV-1

512 are transmitted to the engaged uninfected cells<sup>81, 83-86</sup>. This phenomenon occurs in experimental  
513 models and in humans<sup>87-89</sup>, and has been linked to reduced sensitivity to antiretrovirals<sup>82, 85, 90</sup>.  
514 To understand what happens in a less artificial system, we repeated the experiments in J-Lat cells,  
515 an HIV-1 infected T-cell line harboring one HIV copy per cell, which persists in a latent state, and,  
516 finally, in Jurkat cells infected with a clinical isolate of HIV-1. As in 293T cells, excision through  
517 HIV-LTRs determined a sharp and statistically significant increment in episome numbers. In J-Lat  
518 cells we found that, in the absence of inhibition of RT and IN, the integration events are more  
519 abundant.

520 IN seems to exert a critical role in rescuing proviral DNA, a fact that is not surprising; IN takes part  
521 in various steps of HIV replication<sup>29, 30</sup>. Integration itself is a complex, multistep process catalyzed  
522 by IN that inserts the viral DNA ends into the cellular DNA strands. Integration creates a 2-  
523 nucleotide gap in the viral genome<sup>30</sup> that is then repaired by cellular DNA repair machinery after  
524 integration<sup>73</sup>. Screening of knockout libraries showed that NHEJ plays a chief role in this process,  
525 and depletion of some cellular proteins involved in this pathway decreases provirus integration and  
526 viral infectivity<sup>74-77</sup>. It has also been demonstrated that some NHEJ proteins bind IN and this  
527 complex recruits the catalytic subunit of DNA-dependent protein kinase which triggers a cascade of  
528 phosphorylation and fills the nucleotide gap<sup>78-80</sup>. From our results, it can be speculated that  
529 activation of NHEJ by CRISPR/Cas9 facilitates circularization of excised proviral DNA. Although  
530 this mechanism was not thoroughly investigated, in both cellular models studied, circularization and  
531 reactivation could be enhanced or prevented by adding exogenous IN or inhibiting it, respectively.

532 No matter what cells were used, IN played a crucial role in circularization and HIV persistence, as  
533 demonstrated by the reduction in LTR circle molecule formation and integration in cells treated  
534 with the IN inhibitor RAL. Interestingly, in a recent paper, Dash and colleagues treated HIV-1  
535 infected humanized mice with a long-acting slow-effective release antiviral therapy for 4 weeks and  
536 three weeks later with CRISPR/Cas9 to excise the provirus. The drug regimen included an IN  
537 inhibitor. Five out of 7 mice showed rebound of viremia at levels comparable to animals that

538 received no CRISPR/Cas9 treatment. The Authors did not investigate why this occurred but  
539 speculated that, in the 5 animals, the virus rearranged to reinstate competence for replication<sup>4</sup>. In the  
540 light of our results, it would be informative to perform CRISPR/Cas9 treatment in the context of  
541 antiretroviral treatment that includes RAL, to shed light on the role of IN and RT in shaping the fate  
542 of the excised provirus *in vivo*. We did not observe any difference between LTR circles in J-Lat  
543 cells before or after TNF- $\alpha$  administration, showing that activation alone cannot increase the  
544 number of circles detected (Fig. 6d).

545 Interestingly, circles are indeed present also in Jurkat cells, no matter whether the virus is  
546 productively replicating or dormant. These data show that circles do form without activation, even  
547 if at an obviously much lower number. These data suggest that cutting DNA, thereby activating  
548 NHEJ, brings to the formation of LTR circles. Activation determines amplification of this  
549 phenomenon by the combined activity of RT and IN (Fig. 6 and 8).

550 In conclusion, we provide evidence that if the HIV-1 genome is excised as a single fragment, it  
551 persists and reorganizes in concatemers giving the virus a second chance to express itself and  
552 rebuild an infectious form. Most concatemers and episomes are likely to be lost during subsequent  
553 cell mitosis and have limited persistence in dividing cells but are nonetheless a warning note. This  
554 work stresses the importance of CRISPR/Cas9 strategy in the cure of HIV, and should be a stimulus  
555 to 1) implement the efficacy of delivery systems and CRISPR/Cas9 strategies *in vivo* to achieve  
556 cleavage of HIV genome in multiple sites and in all cells, no matter where the provirus is integrated  
557 and how many copies are present within the cell; 2) prolong antiretroviral treatment to allow  
558 excised provirus to be eliminated.

559

## 560 **Materials and Methods**

561

562 **Cell cultures and plasmids.** Human 293T cell line was purchased from American Type Culture  
563 Collection (ATCC) and cultured in Dulbecco's Modified Eagle's Medium (DMEM) supplemented  
564 with 10% fetal bovine serum (FBS), 2 mM L-glutamine and antibiotics (penicillin, streptomycin) at  
565 37°C and 5% CO<sub>2</sub>. The Jurkat T-cell line was purchased from ATCC and grown in RPMI 1640  
566 supplemented with 10% FBS, 2 mM L-glutamine and antibiotics at 37°C and 5% CO<sub>2</sub> and infected  
567 with a clinical isolate of HIV-1 at a multiplicity of infection (MOI) of 0.05. The human T-lymphoid  
568 J-Lat cell line was obtained through the NIH AIDS Reagent Program, Division of AIDS, NIAID. J-  
569 Lat cells were produced by transducing Jurkat cells with HIV-R7/E-/GFP at low multiplicity of  
570 infection (MOI) in such a way to generate clones containing one copy of integrated HIV per cell.  
571 Cells were cultured in RPMI 1640 supplemented with 10% FBS, 2 mM L-glutamine and antibiotics  
572 at 37°C and 5% CO<sub>2</sub>. J-Lat HIV-R7/E-/GFP, which is full length HIV-1 genome with a non-  
573 functional Env due to a frameshift, and GFP in place of the Nef gene, generates incomplete virions.  
574 HIV-R7/E-/GFP is activated for transcription and expresses GFP by treating J-Lat with TPA, TNF-  
575  $\alpha$ , or exogenous Tat<sup>34</sup>. Activation was performed by supplementing J-Lat cells culture medium with  
576 10 nM TNF- $\alpha$ .

577 pNL4-3/Luc ([https://www.aidsreagent.org/pdfs/ds3418\\_010.pdf](https://www.aidsreagent.org/pdfs/ds3418_010.pdf) Cat n: 3418) and pNL4-3/GFP  
578 ([https://www.aidsreagent.org/11100\\_003.pdf](https://www.aidsreagent.org/11100_003.pdf), Cat n:11100) were obtained through the AIDS  
579 reagent program. The first is an HIV-1 NL4-3 luciferase reporter vector that contains defective Nef,  
580 Env and Vpr; it is competent for a single round of replication. It can only produce infectious virus  
581 after cotransfection with env expression vector. The second is also derived from pNL4-3 but carries  
582 enhanced green fluorescent protein (EGFP) in the *env* open reading frame. This vector expresses an  
583 endoplasmic reticulum (ER)-retained truncated Env-EGFP fusion protein. For linearization  
584 experiments (Fig. 5) we used plasmid pNL-EGFP/CMV/WPREdU3 (pNL-CMV-GFP) (Addgene,  
585 MA, USA). pNL4-3/Luc/Ori and pNL4-3/Luc/Kan were produced by molecular cloning into pNL4-



586 3/Luc. Both SC101, the low copy bacterial origin of replication, and *KanR* were extracted from  
587 pSF\_CMV-SC101 (#OG13, Oxford Genetics, Oxford, UK) following digestion with *SwaI* (SC101)  
588 and *PmeI* (*KanR*). Fragments were cloned in *BseJI* site of pNL4-3 *env*.

589

590 **Digestion of host and linear DNA.** Host and proviral DNA were extracted from cells using a  
591 standard phenol/chloroform method. Briefly, we added one volume of phenol:chloroform:isoamyl  
592 alcohol (25:24:1) per sample and vortexed for 20 seconds, then centrifuged for 5 min at  $16,000 \times g$ .  
593 The aqueous phase containing total DNA was purified by ethanol precipitation. Three  $\mu\text{g}$  of purified  
594 DNA were treated with 2  $\mu\text{l}$  of Plasmid-Safe ATP-dependent exonuclease (Epicentre, Madison,  
595 USA) at  $37^\circ\text{C}$  for 30 minutes and then heat-inactivated by a 30-min incubation at  $70^\circ\text{C}$ .

596

597 **RCA.** Following Plasmid-Safe ATP-dependent exonuclease treatment, circular DNA molecules  
598 were amplified with random examers and TempliPhi DNA polymerase (Merck KGaA, Darmstadt,  
599 Germany) following manufacturer's instruction. Briefly, the reaction mixture containing 10 ng DNA  
600 was incubated at  $30^\circ\text{C}$  for 6 h. The reaction was then blocked by heat inactivation at  $65^\circ\text{C}$  for 5  
601 min.

602

603 **CRISPR/Cas9 design and transfection.** T5 (TTAGACCAGATCTGAGCCT), the CRISPR/Cas9  
604 gRNA targeting the LTR R region and used in 293T cells, was cloned into pSpCas9-2A-Puro (Cat.  
605 No. 62988, Addgene, MA, USA) or in pU6-Cas9-T2A-mCherry (Cat. No. 64324, Addgene)  
606 following a standard protocol<sup>92</sup>. Transfection of DNA plasmids into 293T cells was performed with  
607 standard calcium phosphate method. J-Lat cells were transfected with CRISPR/Cas9 RNP and tracr-  
608 RNA Atto550 (IDT, Coralville, Iowa) by electroporation (NEON Electroporation System, Thermo  
609 Fisher, Massachusetts, USA) using the following parameters: 1400 V, width 10 ms, 3 pulses.

610 Guides 1 and 2 (g1 and g2) were designed using IDT algorithm and as follows: g1 -/A1TR1/  
611 rUrGrArCrArUrCrGrArGrCrUrUrUrCrUrArCrArArGrUrUrUrUrArGrArGrCrUrArUrGrCrU/A1TR

612 2/; g2 -/AITR1/

613 rArCrUrCrArArGrGrCrArArGrCrUrUrUrArUrUrGrGrUrUrUrArGrArGrCrUrArUrGrCrU/AIT

614 R2/; both gRNAs target LTR, g2 the same R site as T5, g1 targets U5.

615

616 **293T cell transduction.** Transduction of 293T cells was performed with VSV-G-pseudotyped  
617 particles. These were produced by transfecting 293T cells with pNL4-3 or its derivatives described  
618 above and VSV-G plasmid. Generated particles were harvested at day 2 or 3 post-transfection and  
619 titrated as described elsewhere<sup>93</sup>. Transduction was performed using MOI 5 to transduce  $2 \times 10^5$   
620 293T cells. Cloning of transduced 293T cells was performed in 96-well plates at the indicated days  
621 post-transduction.

622

623 **ddPCR.** For ddPCR analysis, total DNA from  $5 \times 10^5$  J-Lat cells was purified using Qiagen blood  
624 mini kit (Qiagen, Hilden, Germany) and quantitated spectrophotometrically. Aliquots of 2.5  $\mu$ g  
625 were then *Bse*II digested (Thermo Fisher, MA, USA) to fragment the genomic DNA without  
626 cutting the LTR junctions. Restriction products were column-purified using PCR Clean Up kit  
627 (Qiagen) and 2.5 ng of purified DNA were amplified by ddPCR using the following primers: LTR  
628 circles: Fwd -AACTAGGGAACCCACTGCTTAAG; Rev TCCACAGATCAAGGATATCTTGT;  
629 Probe (FAM) – ACACTACTTGAAGCACTCAAGGC. Reaction was performed as follows: 10 min  
630 at 95°C denaturation, 40 cycles of 95°C for 30 s, and 60°C for 60 s, followed by 98°C for 10 min.  
631 After completion of PCR cycling, reactions were placed in a QX200 instrument (Bio-Rad, Milan,  
632 Italy) and droplets analyzed according to manufacturer's instructions. Normalization was performed  
633 targeting the EIF2C1 gene, using a premade probe solution (Bio-Rad) following manufactures'  
634 instruction.

635

636 **Concatemer isolation, characterization and sequencing.** Selection of clones double positive for  
637 pNL4-3/Luc/Ori and pNL4-3/Luc/Kan was performed by PCR amplification using the following

638 primers: Env Fwd – GACACAATCACACTCCCA; Kan Rev - AATAGCCTCTCCACCCAA; Ori  
639 Rev – TGTGGTGCTATCTGACTT. Selected clones were then transfected with T5 gRNAspCas9  
640 plasmid (Cat. No. 459 Addgene) and cultivated in the presence of Puromycin (3 µg/ml) to select for  
641 the transfected cells. Following DNA extraction and digestion with ATP-dependent exonuclease,  
642 50-200 ng of total DNA, quantitated before exonuclease digestion, were used to transform 10<sup>8</sup>  
643 ultracompetent Stb12 *E. coli* cells (Invitrogen, Carlsbad, CA, USA). Transformants were seeded in  
644 Luria Bertani (LB) agar plates supplemented with Kanamycin (50 µg/ml). Bacterial colonies were  
645 picked and screened to eliminate spurious clones containing residual pNL4-3/Luc/Kan, which also  
646 harbors the Ampicillin resistance gene in the plasmid vector. To this aim, colonies were split and  
647 seeded in two LB broth cultures containing Kanamycin or Ampicillin. Clones growing only in  
648 Kanamycin medium were expanded and concatemers extracted and purified using MAXI prep  
649 (Qiagen). Recovered DNA was tested by PCR to confirm the LTR junction, using the following  
650 primers: Fwd - AACTAGGGAACCCACTGCTTAG; Rev -  
651 GACAAGATATCCTTGATCTGTGGA. Positive clones were sequenced in LTR junctions by cycle  
652 sequencing.

653

654 **Biological activity of excised proviruses and concatemers.** Analyses were focused on the  
655 detection and quantitation of HIV mRNAs and proteins and performed on cell lysates obtained by  
656 transfecting 1 × 10<sup>5</sup> 293T cells with 0.5-1.0 µg of pNL4-3 derivatives. The same analyses and  
657 infectivity as the released virions were assessed with 1 × 10<sup>5</sup> 293T transfected with 0.5-1.0 µg  
658 pNL4-3 derivatives and 0.1 µg VSV-G plasmid. Total cellular RNA was extracted using Maxwell  
659 16 LEV simply RNA extractor (Promega, Madison, USA). Total proteins were extracted using  
660 RIPA buffer (0.22% Beta glycerophosphate, 10% Tergitol-NP40, 0.18% Sodium orthovanadate, 5%  
661 Sodium deoxycholate, 0.38% EGTA, 1% SDS, 6.1% Tris, 0.29% EDTA, 8.8% Sodium chloride,  
662 1.12% Sodium pyrophosphate decahydrate).

663

664 **Measurement of HIV RNA and HIV DNA.** Intracellular and supernatant HIV RNA were  
665 quantitated using COBAS AmpliPrep and COBAS-6800 (Roche, Milan, Italy), respectively. Both  
666 platforms and tests are routinely used at the Virology Unit, Pisa University Hospital, are certified  
667 for *in vitro* diagnostics and detect up to 20 HIV RNA copies/ml. HIV msRNA was detected and  
668 quantitated using TILDA<sup>20</sup>. Briefly, total RNA extracted as above was reverse transcribed at 50°C  
669 for 15 min, denatured at 95°C for 2 min and amplified for 24 cycles (95°C 15 seconds, 60°C, 4 min)  
670 on T100 PCR instrument (Biorad, Hercules, CA, USA). At the end of this process, samples were  
671 diluted to 50 µl with Tris-EDTA buffer and 1 µl of sample was used as template for a second *tat/rev*  
672 real-time PCR reaction. Primer sequences and details to calculate mean and standard deviation of  
673  $\Delta$ CT (threshold cycle) are provided elsewhere<sup>20</sup>. Proviral DNA in 293T cells was assayed with  
674 Xpert HIV-1 Qual, manufactured by Cepheid (Milan, Italy) and certified for *in vitro* diagnostics.  
675 This assay has a sensitivity of 278 copies/ml in whole blood<sup>22, 23</sup>. Before Xpert HIV-1 Qual  
676 analysis, genomic DNA extracted from 293T cells was RNase treated to eliminate contaminating  
677 cellular RNA.

678

679 **HIV-1 integration assay (Alu-PCR).** HIV-1 integration was examined in 293T cells and J-Lat cells  
680 by isolating genomic DNA from  $1 \times 10^6$  cells using the DNeasy Tissue Kit (Qiagen). Alu-LTR  
681 sequences were amplified during first round PCR from 100 ng of total genomic DNA using the  
682 following primers: LM667 5'-  
683 ATGCCACGTAAGCGAAACTCTGGCTAACTAGGGAACCCACTG; Alu1 5'-  
684 TCCCAGCTACTGGGGAGGCTGAGG. Amplification was performed for 16 cycles performed as  
685 follows: denaturation for 3 min at 95°C, 16 cycles of 95°C for 30 s, and 60°C for 60 s, followed by  
686 72°C for 60 s. First round PCR is followed by a second round real-time PCR using a 1:500 dilution  
687 of first PCR mixture together with the Alu-specific primer  $\lambda$ T (5'-ATGCCACGTAAGCGAAACT),  
688 U5 LTR primer LR (5'-TCCCACTGACTAAAAGGGTCTGA) and probe ZXF-P81 (5'-FAM-

689 TGTGACTCTGGTAACTAGAGATCCCTCAGACCC-TAMRA). Real-time PCR amplifications  
690 were performed on a CFX96 machine (Bio-Rad). Results were normalized using the single-copy  
691 Lamin B2 gene that was quantified by real-time PCR (Fwd 5'- CCCAGGGAGTAGGTTGTGA;  
692 Rev 5'- 5'-TGTTATTTGAGAAAAGCCCAAAGAC).

693

694 **Western blot and HIV protein detection.** Total proteins were extracted by direct lysis of samples  
695 using RIPA buffer. Extracted proteins were titrated using the Bradford assay and then analyzed by  
696 ELISA or Western blot. Capsid p24 was measured in cell extracts and supernatants using  
697 SimpleStep ELISA (ABCAM, Cambridge, UK) and ADVIA Centaur HIV Ag/Ab Combo ELISA  
698 (Siemens Healthcare Diagnostics, NY, USA), respectively. RT activity in supernatants was  
699 determined by SG-PERT and as described by Vermeire and colleagues<sup>94</sup>. Western blot analysis was  
700 performed using 20 µg RIPA-extracted proteins and using a mixture of antibodies anti-Tat, anti-  
701 Gag, and anti-IN (ab42359, ab63917 and ab66645, AbCam, Cambridge, UK) or anti-GFP  
702 (ab183734, Abcam), or anti-actin (ab179467, Abcam).

703

704 **Flow cytometry.** Fluorescent cells were measured using Attune NTX (Thermoscientific, USA) or  
705 FACScan (Becton-Dickinson, Florence, Italy). Cells were analyzed 2-3 days post-transfection or as  
706 indicated, following detachment from well plates by Trypsin treatment and pelleting by  
707 centrifugation at  $300 \times g$  for 5 min. Data were analyzed using FSC Express 4 software (DeNovo  
708 Software, Glendale, CA).

709

710 **Statistical analysis.** GraphPad Prism software V5.03 (GraphPad Software, Inc., USA) was used for  
711 statistical analysis. Data were analyzed using the Student's *t*-test. Differences between groups were  
712 considered statistically significant at values of  $p < 0.05$ . All results, including flow cytometry and  
713 ddPCR and Alu-PCR data, were obtained from at least three independent experiments and  
714 expressed as mean  $\pm$  standard error of the mean (SEM). ddPCR and Alu-PCR results were analyzed

715 using one-way ANOVA, \*\* $p < 0.01$ , n.s. not significant. Flow cytometry assay results were  
716 analyzed using the Student's *t*-test, \*\*\*  $p < 0.001$ , \*\*  $p < 0.01$ , \*  $p < 0.1$ .

717 **Acknowledgements**

718 This work was supported by “*SENSOR, nuovi sensori Real-Time per la determinazione di*  
719 *contaminazioni chimiche e microbiologiche in matrici ambientali e biomedicali*”, Progetto co-  
720 finanziato dal POR FESR Toscana 2014-2020; “*Addressing viral neuropathogenesis: Unraveling*  
721 *the molecular and cellular pathways of viral replication and host cell response and paving the way*  
722 *for the development novel host-targeted, broad spectrum, antiviral agents*”, bando PRIN: Progetti  
723 di ricerca di rilevante interesse nazionale, Bando 2017, Prot. 2017KM79NN; and “*I-GENE, In-vivo*  
724 *Gene Editing by Nanotransducers*”, European call identifier H2020-FETOPEN-2018-2020,  
725 Proposal ID 862714.

726

727

728 **Author contributions**

729 ML, EM, OT, GA, and MP conceived and designed the experiments; ML, PQ, GM, SC, SP  
730 performed and analyzed the experiments; FM, MS, GF, OT, JLH supervised analyses, and provided  
731 reagents and resources, MP supervised experiments and provided funding; ML, GF and MP wrote  
732 the manuscript with input from all other authors.

733

734

735 **Conflicts of interest**

736 The authors declare that they have no conflict of interest.

737

738

739 **References**

740

- 741 1. Porteus, M.H. A New Class of Medicines through DNA Editing. *N Engl J Med* 380, 947-  
742 959 (2019).
- 743 2. Xiao Q., Guo D. & Chen S. Application of CRISPR/Cas9-Based Gene Editing in HIV-  
744 1/AIDS Therapy. *Front Cell Infect Microbiol.* 9, 69 (2019).
- 745 3. Ebina, H., Misawa, N., Kanemura, Y. & Koyanagi, Y. Harnessing the CRISPR/Cas9 system  
746 to disrupt latent HIV-1 provirus. *Sci Rep* 3, 2510 (2013).
- 747 4. Dash, P.K. et al. Sequential LASER ART and CRISPR Treatments Eliminate HIV-1 in a  
748 Subset of Infected Humanized Mice. *Nat Commun* 10, 2753 (2019).
- 749 5. Yoder, K.E. & Bundschuh, R. Host Double Strand Break Repair Generates HIV-1 Strains  
750 Resistant to CRISPR/Cas9. *Sci Rep* 6, 29530 (2016).
- 751 6. Wang, G., Zhao, N., Berkhout, B. & Das, A.T. CRISPR-Cas9 Can Inhibit HIV-1  
752 Replication but NHEJ Repair Facilitates Virus Escape. *Mol Ther* 24, 522-526 (2016).
- 753 7. Das, A.T., Binda, C.S. & Berkhout, B. Elimination of infectious HIV DNA by CRISPR-  
754 Cas9. *Curr Opin Virol* 38, 81-88 (2019).
- 755 8. Her, J. & Bunting, S.F. How cells ensure correct repair of DNA double-strand breaks. *J Biol*  
756 *Chem* 293, 10502-10511 (2018).
- 757 9. Xu, L. et al. CRISPR/Cas9-Mediated CCR5 Ablation in Human Hematopoietic  
758 Stem/Progenitor Cells Confers HIV-1 Resistance In Vivo. *Mol Ther* (2017).
- 759 10. Ophinni, Y., Inoue, M., Kotaki, T. & Kameoka, M. CRISPR/Cas9 system targeting  
760 regulatory genes of HIV-1 inhibits viral replication in infected T-cell cultures. *Sci Rep* 8, 7784  
761 (2018).
- 762 11. June, C.H. Emerging Use of CRISPR Technology - Chasing the Elusive HIV Cure. *N Engl J*  
763 *Med* 381, 1281-1283 (2019).



- 764 12. Lee, S.K. et al. Quantification of the Latent HIV-1 Reservoir Using Ultra Deep Sequencing  
765 and Primer ID in a Viral Outgrowth Assay. *J Acquir Immune Defic Syndr* 74, 221-228 (2017).
- 766 13. Teo, I. et al. Circular forms of unintegrated human immunodeficiency virus type 1 DNA and  
767 high levels of viral protein expression: association with dementia and multinucleated giant cells in  
768 the brains of patients with AIDS. *J Virol* 71, 2928-2933 (1997).
- 769 14. Meltzer, B. et al. Tat controls transcriptional persistence of unintegrated HIV genome in  
770 primary human macrophages. *Virology* 518, 241-252 (2018).
- 771 15. Petitjean, G. et al. Unintegrated HIV-1 provides an inducible and functional reservoir in  
772 untreated and highly active antiretroviral therapy-treated patients. *Retrovirology* 4, 60 (2007).
- 773 16. Seclen, E. Prospects of CRISPR/Cas9 for HIV Elimination. *AIDS Rev* 21, 109-111 (2019).
- 774 17. Zhang H, Zhou Y, Alcock C, Kiefer T, Monie D, Siliciano J, Li Q, Pham P, Cofrancesco J,  
775 Persaud D and Siliciano RF. Novel Single-Cell-Level Phenotypic Assay for Residual Drug  
776 Susceptibility and Reduced Replication Capacity of Drug-Resistant Human Immunodeficiency  
777 Virus Type 1. *J of Virology* 78:1718-1729, 2004.
- 778 18. Fischer, M. et al. Residual cell-associated unspliced HIV-1 RNA in peripheral blood of  
779 patients on potent antiretroviral therapy represents intracellular transcripts. *Antivir Ther* 7, 91-103  
780 (2002).
- 781 19. Hermankova, M. et al. Analysis of human immunodeficiency virus type 1 gene expression  
782 in latently infected resting CD4+ T lymphocytes in vivo. *J Virol* 77, 7383-7392 (2003).
- 783 20. Procopio, F.A. et al. A Novel Assay to Measure the Magnitude of the Inducible Viral  
784 Reservoir in HIV-infected Individuals. *EBioMedicine* 2, 874-883 (2015).
- 785 21. Pizzato, M. et al. A one-step SYBR Green I-based product-enhanced reverse transcriptase  
786 assay for the quantitation of retroviruses in cell culture supernatants. *J Virol Methods* 156, 1-7  
787 (2009).
- 788 22. Michaeli, M. et al. Evaluation of Xpert HIV-1 Qual assay for resolution of HIV-1 infection  
789 in samples with negative or indeterminate Geenius HIV-1/2 results. *J Clin Virol* 76, 1-3 (2016).

- 790 23. Swathirajan, C.R. et al. Performance of point-of-care Xpert HIV-1 plasma viral load assay at  
791 a tertiary HIV care centre in Southern India. *J Med Microbiol* 66, 1379-1382 (2017).
- 792 24. Gelderblom, H.C. et al. Viral complementation allows HIV-1 replication without  
793 integration. *Retrovirology* 5, 60 (2008).
- 794 25. Sharkey, M. et al. Episomal viral cDNAs identify a reservoir that fuels viral rebound after  
795 treatment interruption and that contributes to treatment failure. *PLoS Pathog* 7, e1001303 (2011).
- 796 26. Sloan, R.D. & Wainberg, M.A. The role of unintegrated DNA in HIV infection.  
797 *Retrovirology* 8, 52 (2011).
- 798 27. Wu, Y. The second chance story of HIV-1 DNA: Unintegrated? Not a problem!  
799 *Retrovirology* 5, 61 (2008).
- 800 28. Andrade, M.D. & Skalka, A.M. Retroviral Integrase: Then and Now. *Annu Rev Virol* 2,  
801 241-264 (2015).
- 802 29. Craigie, R. Nucleoprotein Intermediates in HIV-1 DNA Integration: Structure and Function  
803 of HIV-1 Intasomes. *Subcell Biochem* 88, 189-210 (2018).
- 804 30. Richetta, C. et al. Two-long terminal repeat (LTR) DNA circles are a substrate for HIV-1  
805 integrase. *J Biol Chem* 294, 8286-8295 (2019).
- 806 31. Li, L. et al. Role of the non-homologous DNA end joining pathway in the early steps of  
807 retroviral infection. *EMBO J* 20, 3272-3281 (2001).
- 808 32. Skalka, A.M. & Katz, R.A. Retroviral DNA integration and the DNA damage response. *Cell*  
809 *Death Differ* 12 Suppl 1, 971-978 (2005).
- 810 33. Jordan, A., Bisgrove, D. & Verdin, E. HIV reproducibly establishes a latent infection after  
811 acute infection of T cells in vitro. *EMBO J* 22, 1868-1877 (2003).
- 812 34. Acchioni, C. et al. Alternate NF-kappaB-Independent Signaling Reactivation of Latent HIV-  
813 1 Provirus. *J Virol* 93 (2019).

- 814 35. Jacobi, A.M. et al. Simplified CRISPR tools for efficient genome editing and streamlined  
815 protocols for their delivery into mammalian cells and mouse zygotes. *Methods* 121-122, 16-28  
816 (2017).
- 817 36. Liang, X. et al. Rapid and highly efficient mammalian cell engineering via Cas9 protein  
818 transfection. *J Biotechnol* 208, 44-53 (2015).
- 819 37. Rutsaert, S. et al. In-depth validation of total HIV-1 DNA assays for quantification of  
820 various HIV-1 subtypes. *Sci Rep* 8, 17274 (2018).
- 821 38. Delelis, O. et al. A novel function for spumaretrovirus integrase: an early requirement for  
822 integrase-mediated cleavage of 2 LTR circles. *Retrovirology* 2, 31 (2005).
- 823 39. Sunshine, S. et al. HIV Integration Site Analysis of Cellular Models of HIV Latency with a  
824 Probe-Enriched Next-Generation Sequencing Assay. *J Virol* 90, 4511-4519 (2016).
- 825 40. Lenasi, T., Contreras, X. & Peterlin, B.M. Transcriptional interference antagonizes proviral  
826 gene expression to promote HIV latency. *Cell Host Microbe* 4, 123-133 (2008).
- 827 41. Sullivan, N.T. et al. Designing Safer CRISPR/Cas9 Therapeutics for HIV: Defining Factors  
828 That Regulate and Technologies Used to Detect Off-Target Editing. *Front Microbiol.* 11, 1872  
829 (2020).
- 830 42. Kaminski, R. et al. Excision of HIV-1 DNA by gene editing: a proof-of-concept in vivo  
831 study. *Gene Ther* 23, 690-695 (2016).
- 832 43. Kaminski, R. et al. Elimination of HIV-1 Genomes from Human T-lymphoid Cells by  
833 CRISPR/Cas9 Gene Editing. *Sci Rep* 6, 22555 (2016).
- 834 44. Kosicki, M., Tomberg, K. & Bradley, A. Repair of double-strand breaks induced by  
835 CRISPR-Cas9 leads to large deletions and complex rearrangements. *Nat Biotechnol* 36, 765-771  
836 (2018).
- 837 45. Del Portillo, A. et al. Multiploid inheritance of HIV-1 during cell-to-cell infection. *J Virol*  
838 85, 7169-7176 (2011).

- 839 46. Garfinkel, D.J. et al. Retrotransposon suicide: formation of Ty1 circles and autointegration  
840 via a central DNA flap. *J Virol* 80, 11920-11934 (2006).
- 841 47. Roychoudhury, P. et al. Viral diversity is an obligate consideration in CRISPR/Cas9 designs  
842 for targeting the HIV reservoir. *BMC Biol* 16, 75 (2018).
- 843 48. Marini, B. et al. Nuclear architecture dictates HIV-1 integration site selection. *Nature* 521,  
844 227-231 (2015).
- 845 49. Ueda, S., Ebina, H., Kanemura, Y., Misawa, N. & Koyanagi, Y. Anti-HIV-1 potency of the  
846 CRISPR/Cas9 system insufficient to fully inhibit viral replication. *Microbiol Immunol* 60, 483-496  
847 (2016).
- 848 50. Telwatte, S. et al. Heterogeneity in HIV and cellular transcription profiles in cell line models  
849 of latent and productive infection: implications for HIV latency. *Retrovirology* 16, 32 (2019).
- 850 51. Zhang, Y. et al. Comprehensive off-target analysis of dCas9-SAM-mediated HIV  
851 reactivation via long noncoding RNA and mRNA profiling. *BMC Med Genomics* 11, 78 (2018).
- 852 52. Lebbink, R.J. et al. A combinational CRISPR/Cas9 gene-editing approach can halt HIV  
853 replication and prevent viral escape. *Sci Rep* 7, 41968 (2017).
- 854 53. Wang, G., Zhao, N., Berkhout, B. & Das, A.T. A Combinatorial CRISPR-Cas9 Attack on  
855 HIV-1 DNA Extinguishes All Infectious Provirus in Infected T Cell Cultures. *Cell Rep* 17, 2819-  
856 2826 (2016).
- 857 54. Yin, C. et al. In Vivo Excision of HIV-1 Provirus by saCas9 and Multiplex Single-Guide  
858 RNAs in Animal Models. *Mol Ther* 25, 1168-1186 (2017).
- 859 55. Sharkey, M.E. et al. Persistence of episomal HIV-1 infection intermediates in patients on  
860 highly active anti-retroviral therapy. *Nat Med* 6, 76-81 (2000).
- 861 56. Bonhoeffer, S., Coffin, J.M. & Nowak, M.A. Human immunodeficiency virus drug therapy  
862 and virus load. *J Virol* 71, 3275-3278 (1997).
- 863 57. Bell, P., Montaner, L.J. & Maul, G.G. Accumulation and intranuclear distribution of  
864 unintegrated human immunodeficiency virus type 1 DNA. *J Virol* 75, 7683-7691 (2001).

- 865 58. Vatakis, D.N., Bristol, G., Wilkinson, T.A., Chow, S.A. & Zack, J.A. Immediate activation  
866 fails to rescue efficient human immunodeficiency virus replication in quiescent CD4+ T cells. *J*  
867 *Virol* 81, 3574-3582 (2007).
- 868 59. Robinson, H.L. & Zinkus, D.M. Accumulation of human immunodeficiency virus type 1  
869 DNA in T cells: results of multiple infection events. *J Virol* 64, 4836-4841 (1990).
- 870 60. Pang, S. et al. High levels of unintegrated HIV-1 DNA in brain tissue of AIDS dementia  
871 patients. *Nature* 343, 85-89 (1990).
- 872 61. Spina, C.A., Guatelli, J.C. & Richman, D.D. Establishment of a stable, inducible form of  
873 human immunodeficiency virus type 1 DNA in quiescent CD4 lymphocytes in vitro. *J Virol* 69,  
874 2977-2988 (1995).
- 875 62. Shaw, G.M. et al. Molecular characterization of human T-cell leukemia (lymphotropic) virus  
876 type III in the acquired immune deficiency syndrome. *Science* 226, 1165-1171 (1984).
- 877 63. Bukrinsky, M.I., Stanwick, T.L., Dempsey, M.P. & Stevenson, M. Quiescent T lymphocytes  
878 as an inducible virus reservoir in HIV-1 infection. *Science* 254, 423-427 (1991).
- 879 64. Li, Y. et al. Molecular characterization of human immunodeficiency virus type 1 cloned  
880 directly from uncultured human brain tissue: identification of replication-competent and -defective  
881 viral genomes. *J Virol* 65, 3973-3985 (1991).
- 882 65. Yan, N., Cherepanov, P., Daigle, J.E., Engelman, A. & Lieberman, J. The SET complex acts  
883 as a barrier to autointegration of HIV-1. *PLoS Pathog* 5, e1000327 (2009).
- 884 66. Kim, S.Y., Byrn, R., Groopman, J. & Baltimore, D. Temporal aspects of DNA and RNA  
885 synthesis during human immunodeficiency virus infection: evidence for differential gene  
886 expression. *J Virol* 63, 3708-3713 (1989).
- 887 67. Wu, Y. & Marsh, J.W. Selective transcription and modulation of resting T cell activity by  
888 preintegrated HIV DNA. *Science* 293, 1503-1506 (2001).
- 889 68. Martinez-Picado, J., Zurakowski, R., Buzon, M.J. & Stevenson, M. Episomal HIV-1 DNA  
890 and its relationship to other markers of HIV-1 persistence. *Retrovirology* 15, 15 (2018).

- 891 69. Chan, C.N. et al. HIV-1 latency and virus production from unintegrated genomes following  
892 direct infection of resting CD4 T cells. *Retrovirology* 13, 1 (2016).
- 893 70. Stevenson, M. et al. Integration is not necessary for expression of human immunodeficiency  
894 virus type 1 protein products. *J Virol* 64, 2421-2425 (1990).
- 895 71. Negri, D.R., Michelini, Z. & Cara, A. Toward integrase defective lentiviral vectors for  
896 genetic immunization. *Curr HIV Res* 8, 274-281 (2010).
- 897 72. Wu, Y. & Marsh, J.W. Early transcription from nonintegrated DNA in human  
898 immunodeficiency virus infection. *J Virol* 77, 10376-10382 (2003).
- 899 73. Lesbats, P., Engelman, A.N. & Cherepanov, P. Retroviral DNA Integration. *Chem Rev* 116,  
900 12730-12757 (2016).
- 901 74. Brass, A.L. et al. Identification of host proteins required for HIV infection through a  
902 functional genomic screen. *Science* 319, 921-926 (2008).
- 903 75. Daniel, R. et al. Evidence that stable retroviral transduction and cell survival following DNA  
904 integration depend on components of the nonhomologous end joining repair pathway. *J Virol* 78,  
905 8573-8581 (2004).
- 906 76. Konig, R. et al. Global analysis of host-pathogen interactions that regulate early-stage HIV-1  
907 replication. *Cell* 135, 49-60 (2008).
- 908 77. Yoder, K.E. et al. The base excision repair pathway is required for efficient lentivirus  
909 integration. *PLoS One* 6, e17862 (2011).
- 910 78. Zheng, Y., Ao, Z., Wang, B., Jayappa, K.D. & Yao, X. Host protein Ku70 binds and  
911 protects HIV-1 integrase from proteasomal degradation and is required for HIV replication. *J Biol*  
912 *Chem* 286, 17722-17735 (2011).
- 913 79. Anisenko, A.N. et al. Characterization of HIV-1 integrase interaction with human Ku70  
914 protein and initial implications for drug targeting. *Sci Rep* 7, 5649 (2017).
- 915 80. Knyazhanskaya, E. et al. NHEJ pathway is involved in post-integrational DNA repair due to  
916 Ku70 binding to HIV-1 integrase. *Retrovirology* 16, 30 (2019).

- 917 81. Wodarz, D. & Levy, D.N. Effect of multiple infection of cells on the evolutionary dynamics  
918 of HIV in vivo: implications for host adaptation mechanisms. *Exp Biol Med (Maywood)* 236, 926-  
919 937 (2011).
- 920 82. Maldarelli, F. HIV-infected cells are frequently clonally expanded after prolonged  
921 antiretroviral therapy: implications for HIV persistence. *J Virus Erad* 1, 237-244 (2015).
- 922 83. Russell, R.A., Martin, N., Mitar, I., Jones, E. & Sattentau, Q.J. Multiple proviral integration  
923 events after virological synapse-mediated HIV-1 spread. *Virology* 443, 143-149 (2013).
- 924 84. Sattentau, Q.J. Cell-to-Cell Spread of Retroviruses. *Viruses* 2, 1306-1321 (2010).
- 925 85. Sigal, A. et al. Cell-to-cell spread of HIV permits ongoing replication despite antiretroviral  
926 therapy. *Nature* 477, 95-98 (2011).
- 927 86. Zhong, P. et al. Cell-to-cell transmission can overcome multiple donor and target cell  
928 barriers imposed on cell-free HIV. *PLoS One* 8, e53138 (2013).
- 929 87. Law, K.M. et al. In Vivo HIV-1 Cell-to-Cell Transmission Promotes Multicopy Micro-  
930 compartmentalized Infection. *Cell Rep* 15, 2771-2783 (2016).
- 931 88. Kolodkin-Gal, D. et al. Efficiency of cell-free and cell-associated virus in mucosal  
932 transmission of human immunodeficiency virus type 1 and simian immunodeficiency virus. *J Virol*  
933 87, 13589-13597 (2013).
- 934 89. Murooka, T.T. et al. HIV-infected T cells are migratory vehicles for viral dissemination.  
935 *Nature* 490, 283-287 (2012).
- 936 90. Lorenzo-Redondo, R. et al. Persistent HIV-1 replication maintains the tissue reservoir  
937 during therapy. *Nature* 530, 51-56 (2016).
- 938 91. Chen, X. et al. Dual sgRNA-directed gene knockout using CRISPR/Cas9 technology in  
939 *Caenorhabditis elegans*. *Sci Rep* 4, 7581 (2014).
- 940 92. Pistello, M. et al. Streamlined design of a self-inactivating feline immunodeficiency virus  
941 vector for transducing ex vivo dendritic cells and T lymphocytes. *Genet Vaccines Ther* 5, 8 (2007).

- 942 93. Vermeire, J. et al. Quantification of reverse transcriptase activity by real-time PCR as a fast  
943 and accurate method for titration of HIV, lenti- and retroviral vectors. PLoS One 7, e50859 (2012).
- 944 94. Ankel H. et al. Prostaglandin A inhibits replication of human immunodeficiency virus  
945 during acute infection. J Gen Virol, 72, 2797 (1991).
- 946



947 **Legend to figures**

948

949 **Fig. 1 CRISPR/Cas9 efficiently cleaves the HIV-1 provirus in 293T cells transduced with NL4-**

950 **3/GFP or NL4-3/Luc. a,** 293T cells that had been transduced with NL4-3/Luc were transfected  
951 with CRISPR/Cas9 and either scrambled (SC) or HIV-1 specific (T5) gRNAs and analyzed for Luc  
952 expression at day 0, 1, 2, 3, 4. Decrease in Luc expression in T5 gRNA-treated cells compared to  
953 untreated or SC gRNA-treated cells reached statistical significance at day 2 ( $p < 0.001$ ). Standard  
954 deviation (SD) was calculated from three independent experiments. **b,** Cell viability was assessed  
955 by WST-8 48 hours after CRISPR/Cas9 transfection and showed no significant difference between  
956 cells transfected with NL4-3/Luc alone or in combination with Cas9+SC or +T5 gRNAs, and  
957 untreated cells. Shown are the means of three independent experiments with 6 technical replicates  
958 ( $n = 3$ ;  $m = 6$ ) and SD. Statistical analyses were performed using the Student's T test. **c,** Schematic  
959 of the flow cytometry analysis of GFP expression by 293T cells either not transduced or that had  
960 been previously transduced with NL4-3/GFP pseudotyped with VSV-G, and left as such (NL4-  
961 3/GFP) or then transfected with the SC- or T5 gRNA-containing CRISPR/Cas9 mCherry plasmid.  
962 **d,** Flow cytometry analysis of cells described in **c** was performed at day 4 post-transfection,  
963 showing that T5 significantly decreased, but did not ablate, GFP expression by the provirus. **e,**  
964 Statistical analysis of the values obtained in **d**. Shown are the means of three independent  
965 experiments with biological triplicates ( $n = 3$ ;  $m = 3$ ) and the SD. Statistical analyses were  
966 performed using the Student's T test ( $*** = p < 0.001$ ). **f,** Western blot analysis of GFP protein levels  
967 at day 7 in lysates from 293T cells first transduced with NL4-3/GFP then either left as such (-) or  
968 transfected with Cas9+SC or +T5 gRNAs. A control of cells transfected with a GFP coding plasmid  
969 (pcDNA3/GFP) is included. **g,** Localization of primers used to amplify the DNA fragments  
970 encompassing the CRISPR/Cas9 T5 cleavage sites. **h,** Sequence data of four amplicons sequenced  
971 at the LTR junctions and blasted against pNL4-3.

972

973 **Fig. 2 The excised HIV-1 provirus persists and circularizes after CRISPR/Cas9-transfection.**

974 **a**, PCR analysis of  $\beta$ -globin gene in genomic DNA samples from NL4-3/Luc-transduced 293T cells  
975 extracted at day 2, 6, 10, 14 and 18 post CRISPR/Cas9 transfection, before (-) and after (+) ATP-  
976 dependent DNA exonuclease digestion. M: Molecular weight marker. **b**, PCR analysis of *gag* and  
977 *pol* sequences of genomic DNA treated as in **a** with ATP-dependent DNA exonuclease digestion. **c**,  
978 Rolling circle amplification (RCA) of DNA samples extracted from NL4-3/Luc-transduced at day  
979 10 post-CRISPR/Cas9 and T5 or SC gRNAs transfection. This technique allows selective  
980 amplification of circularized DNA as concatemers, requiring digestion with a single cutter to obtain  
981 full length fragments. RCA amplicons were electrophoresed as such (-) or after *EcoRI* digestion (+),  
982 which cuts NL4-3/Luc once in *pol*. 293 T were used as a negative control. **d**, Schematic of circular  
983 molecules of HIV-1 provirus formed by a single molecule or two molecules bound together in  
984 sense-to-sense or sense-to-antisense orientation and size of the amplicons of interest written in red  
985 and generated by the primers indicated. **e**, PCR fragments obtained from RCA amplicons from 7  
986 different experiments (#RCA1-7) using the primers shown in Fig. 2d. **f**, Alignment of LTR  
987 sequencing of the 750-bp fragments obtained from #RCA1-7 and retrieved from the agarose gel of  
988 Fig. 2e. The red sequences indicate the T5 gRNA annealing site. Dashes indicate base deletions and  
989 blue letters denote nucleotide mismatches compared to wild-type pNL4-3 sequence.

990

991 **Fig. 3 HIV intermolecular concatemers can be isolated in large scale. a**, Schematic of the

992 approach devised to select and identify inter-molecular concatemers. 293T cells were transduced at  
993 5 MOI with both HIV-Ori and HIV-KanR. A week later, their HIV-1 provirus was excised by  
994 CRISPR/Cas9 + T5 gRNA and the edited cells were selected by Puromycin. Then, their genomic  
995 DNA was extracted, digested by ATP-dependent exonuclease to eliminate linear DNA and used to  
996 transform bacteria. The recombinant bacteria were then selected on Kanamycin-containing agar  
997 plates, where only intermolecular joining brought about growing colonies. **b**, Graphic map of NL4-  
998 3/Luc/Ori and NL4-3/Luc/KanR as obtained by inserting the low-copy bacterial origin of

999 replication SC101 (Ori) or Kanamycin resistance gene (*KanR*) in the pNL4-3/Luc backbone. **c**,  
1000 Evaluation of transducing ability of lentiviral vectors as determined by luciferase activity of 293T  
1001 cells transduced with VSV-G-pseudotyped NL4-3/Luc/Ori and NL4-3/Luc/*KanR* as compared to  
1002 NL4-3/Luc, NL4-3/GFP and non-transduced 293T cells. **d**, Screening of 11 cell clones double-  
1003 positive for NL4-3/Luc/Ori and NL4-3/Luc/*KanR* obtained by limiting dilution. For PCR, primers  
1004 annealing to SC101 or *KanR* and pNL4-3 were used. **e**, PCR amplification of the LTR junctions  
1005 from NL4-3/Luc/*KanR*/Ori double-positive cell clones a-e. **f**, Sequence analysis of a-e amplicons  
1006 obtained in **e**. The red sequences indicate the T5 gRNA annealing site. Dashes indicate base  
1007 deletions and green letters denote nucleotide mismatches compared to wild-type pNL4-3 LTR  
1008 sequence. **g**, Schematic of inter-molecular concatemers bound in sense-sense orientation, as  
1009 determined by nucleotide sequencing.

1010

1011 **Fig. 4 Without Tat and Rev, the concatemers are not transcribed.** Analysis of HIV mRNA and  
1012 protein production by NL4-3/Luc/*KanR*/Ori transfected alone or with Tat + Rev provided *in trans*.  
1013 **a**, qRT-PCR quantitation of *gag* mRNA expression by cells transfected with pNL4-3/Luc or pNL4-  
1014 3/Luc/*KanR* or pNL4-3/Luc/*KanR*/Ori alone or after transfection of Tat alone or Tat + Rev. Cells  
1015 were lysed 3 days after transfection. Increment in *gag* mRNA expression following Tat or Tat +  
1016 Rev provided *in trans* reached statistical significance ( $p=0.0013$ ). **b**, Determination of p24 content  
1017 by ELISA in lysates of cells transfected with pNL4-3/Luc or pNL4-3/Luc/*KanR*, as such or after  
1018 1:50 dilution, or with NL4-3/Luc/*KanR*/Ori before and after CRISPR/Cas9+T5 treatment.  
1019 Production of p24 with pNL4-3/Luc and pNL4-3/Luc/*KanR* was comparable but significantly  
1020 decreased following pNL4-3/Luc/*KanR* treatment with CRISPR/Cas9+T5. Isolated concatemers  
1021 exhibited reduced but significant transcriptional activity. **c**, Western blot analysis performed on  
1022 lysates of cells transfected with pNL4-3/Luc or NL4-3/Luc/*KanR*/Ori, either with Tat + Rev or  
1023 alone, or not transfected 293T cells. Detection with antibodies anti-Tat, anti-p24, and anti-IN  
1024 demonstrated low production of the three proteins by NL4-3/Luc/*KanR*/Ori that markedly increased

1025 after addition of Tat + Rev. **d**, TILDA, a method that detects multiply spliced RNA (msRNA), did  
1026 not indicate production of msRNA by NL4-3/Luc/KanR/Ori-transfected cells. **e**, SG-PERT, which  
1027 measures RT activity in supernatants as quantified by 10-fold dilutions of mammalian murine  
1028 leukemia virus (MMLV) RT, was used to determine RT activity in supernatants of cells transfected  
1029 with NL4-3/Luc/KanR/Ori or pNL4-3/Luc (upper panel) or NL4-3/Luc/KanR/Ori with or without  
1030 Tat + Rev (lower panel). **f**, Determination of p24 content as in **b** and after transfection with Tat or  
1031 Tat + Rev. **g**, Analysis of proviral DNA content of 293T cells cultivated in the presence of  
1032 supernatants from cells transfected with pNL4-3/GFP, or NL4-3/Luc/KanR/Ori, alone or combined  
1033 with Tat+Rev, or control 293T cells, and, for all, VSV-G provided *in trans*. This analysis,  
1034 performed with HIV-Qual assay, demonstrated that addition of Tat + Rev, compared to NL4-  
1035 3/Luc/KanR/Ori alone, yields increased HIV viral particle production. Data were collected from  
1036 three independent experiments with four replicates each and analyzed by Student's T test (\*\*\*) =  
1037  $p < 0.001$ ).

1038

1039 **Fig. 5 HIV IN contributes to circularization and integration of excised provirus.** **a**, Schematic  
1040 workflow of the experiment. The HIV provirus was obtained from pNL-CMV-GFP by digestion  
1041 with *PmiI*, gel purified and electroporated into 293T cells, either linearized, alone or in association  
1042 to pCMV-IN, or as a closed plasmid. **b**, Agarose gel electrophoresis of pNL-CMV-GFP digested  
1043 with *PmiI*. The upper band denotes the linearized HIV provirus that was extracted, purified and  
1044 used for transfection as described in **a**. **c**, Percentage of GFP+ 293T cells after transfection with  
1045 pNL-CMV-GFP, linearized, with IN (+) or without IN (-), or closed, as determined by flow  
1046 cytometry. Bars indicate SD as determined from three independent experiments. The percentage of  
1047 fluorescent cells transfected with the linear provirus and pCMV-IN was significantly higher than for  
1048 cells transfected with the linear provirus alone, as determined by Student's T test ( $p < 0.001$ ). **d**,  
1049 Fluorescence microscopy and flow cytometry analyses of the cells plotted in the histogram of Fig.  
1050 5c. Increment in cell fluorescence in the presence of HIV IN suggests that IN contributes to rescue

1051 transcriptional capacity of the linearized provirus. **e**, Schematic of Alu-PCR reaction. This reaction  
1052 was used to understand if the provirus integrates into host cell DNA. The first round creates a  
1053 tagged Alu-HIV-LTR fragment that is subsequently reamplified and detected by a specific probe. **f**,  
1054 Histogram plot of the Alu-PCR reaction showing that the amount of provirus integrated back is  
1055 significantly increased in the presence of HIV IN compared to the same without HIV IN. Statistical  
1056 analysis was performed by one-way ANOVA and Bonferroni post-hoc test ( $p < 0.001$ ).

1057

1058 **Fig. 6 Circularization of the excised provirus is facilitated if cleaved out in the presence of**  
1059 **HIV IN also in latently infected lymphocytes. a**, Schematic illustration of J-Lat treatment,  
1060 localization of g1 and g2 guides, and detection of LTR circles by ddPCR. J-Lat cells were exposed  
1061 to TNF- $\alpha$  to activate HIV expression (and viral protein production) and then transfected with g1, g2,  
1062 g1 + g2 or SC and incubated for 24 h as such, or with RAL. ddPCR was performed on genomic  
1063 DNA digested with *Bse*II using primers for HIV *nef* and LTR, that allow amplification of circles  
1064 only. **b**, Timeline of drug addition, RNP transfection and total DNA extraction. J-Lat cells were  
1065 treated with 10 ng/ml of TNF- $\alpha$  and 1 h later RAL, 10  $\mu$ M, was added. RNP transfection was done  
1066 after 2 h and, 12 h later, total DNA was extracted for ddPCR. **c**, A typical ddPCR experiment is  
1067 shown, where *nef*-LTR junction concentration is determined. Results demonstrate that the number  
1068 of LTR circle molecules significantly increased in cells treated with TNF- $\alpha$ . RAL treatment causes  
1069 considerable decrease in LTR circle formation. Poisson error bars (confidence interval 95%) of  
1070 ddPCR values are shown, as determined automatically by the software after every ddPCR run. **d**,  
1071 Histogram plot of the average number of LTR circle molecules from 3 independent experiments  
1072 (black circles), performed as described in **b**. Statistical analysis of ddPCR values, performed using  
1073 single-way Anova (red asterisks) and Tukey's multiple comparison test (black asterisks), shows that  
1074 RAL pre-treatment decreased LTR circle molecule formation (\*\*\*)  $p < 0.001$ . **e**, The experiment  
1075 described in **b** was performed without TNF- $\alpha$  or RAL treatment. A typical ddPCR experiment is  
1076 shown as in **c**. Results demonstrate that LTR circle molecules are formed also in the absence of HIV

1077 activation. **f**, Histogram plot representation of 2 independent experiments as in **e**. Statistical analysis  
1078 was performed using single-way Anova (\*  $p < 0.1$ ).

1079

1080 **Fig. 7 RAL pretreatment prevents reactivation of HIV after RNP transfection. a**, Schematic  
1081 workflow of the experiment: J-Lat cells, pretreated or not with 10  $\mu$ M RAL, were transfected with  
1082 Atto550-RNP containing g1, g2, g1+ g2, or the SC control guide. This allowed tracking of RNP-  
1083 transfected cells that became fluorescently labelled in red. Five hours post-RNP treatment, HIV-1  
1084 transcription, and associated GFP expression, was induced by treating cells with TNF- $\alpha$ . HIV  
1085 reactivation was quantified in RNP-treated cells by flow cytometry performed 24 hours post-RNP  
1086 treatment. **b**, Flow cytometry analysis of J-Lat cells untransfected, transfected with g1, g2, g1 + g2,  
1087 or SC, in the presence or not of RAL. All cells were activated with TNF- $\alpha$  5 h after transfection.  
1088 Ungated events are analyzed. The grey histogram in the overlays shows untreated, latent J-Lat  
1089 cells. RNP transfection combined with RAL abolished HIV activation. **c**, Histogram plot of panels  
1090 in Fig. 7b. The number of GFP<sup>+</sup> cells is significantly lower upon RNP treatment with g1, g2 and g1  
1091 + g2 compared to SC gRNA. Combined treatment with g1 + g2 or with g2 alone is the most and the  
1092 least effective, respectively, in reducing activated, GFP<sup>+</sup> cells. Pretreatment with RAL together  
1093 with RNP transfection dramatically reduces induction of HIV-1 transcription.

1094

1095 **Fig. 8 HIV-1 is reintegrated by IN and amplified by RT. a**, Alu-PCR, performed as in Fig. 5,  
1096 was carried out to detect the HIV-1 provirus integrated in proximity of Alu sequences of J-Lat cells.  
1097 Alu-LTR copies are detected after activation with TNF- $\alpha$  and much less if treated with RAL. Latent  
1098 cells treated with RNPs did not exhibit integration in Alu sites. **b**, Schematic workflow of the  
1099 experiment shown in Fig. 8c and d. Cells were activated for 24 h with TNF- $\alpha$ , then treated with  
1100 RAL or EFV or RAL + EFV for 24 h. RNP transfection with g2 was then carried out and the  
1101 genomic DNA extracted 24 h later. Alu-LTR molecules were determined after normalization with

1102  $\beta$ -globin DNA content. **c**, Histogram representation of Alu-PCR. RAL inhibits integration in Alu  
1103 more than EFV alone, while combined treatment is more efficient than the single drugs alone.  
1104 Guide g2 transfection greatly decreases Alu integration, whether alone or in the presence of  
1105 RAL/EFV. **d**, Statistical analysis of Alu-LTR content of g2 RNP transfected cells alone. Single or  
1106 combined treatments with RAL and/or EFV decreases efficiency of HIV reintegration. Data were  
1107 obtained from three independent experiments and three biological replicates. Data were analyzed  
1108 using One-way Anova (\*  $p < 0.1$ , \*\*\*  $p < 0.001$ ).

1109

1110 **Fig. 9 Cas9 proviral ablation increases the LTR circles of HIV-1.** **a**, schematic illustration of the  
1111 experimental procedure:  $4 \times 10^6$  Jurkat cells were infected with an HIV-1 clinical isolate. 24 h after  
1112 the infection, cells were treated for 7 days with RAL 10  $\mu$ M, EFV 100 nm and RAL 10  $\mu$ M + EFV  
1113 100 nM. Then, cells were electroporated with Cas9 g2 RNP and processed for ddPCR. **b**, ddPCR  
1114 shows an increase in LTR circles in Jurkat cells transfected with g2 RNP; RAL decreases the  
1115 amount of LTR circles in both experimental groups (transfected/not transfected). Y axis = LTR  
1116 circles concentration expressed as copies/ $\mu$ l. **c**, Statistical analysis performed on ddPCR reads. One-  
1117 Way Anova with post-hoc Tukey test was performed, experiments are expressed as mean  $\pm$  SD (\*  
1118  $p < 0.1$ , \*\*  $p < 0.01$ , \*\*\*  $p < 0.001$ ). **d**, RT-PCR of viral RNA extracted from supernatants of cells  
1119 described in **a** at 0, 2, 9 and 12 days from HIV infection. Y axis: copies of HIV-1 genomes/ $\mu$ l  
1120 supernatant. **e**, Statistical analysis performed on RT-PCR reads at day 12. One-Way Anova with  
1121 post-hoc Tukey test was performed, experiments are expressed as mean  $\pm$  SD (\*  $p < 0.1$ , \*\*  $p < 0.01$ ,  
1122 \*\*\*  $p < 0.001$ ).

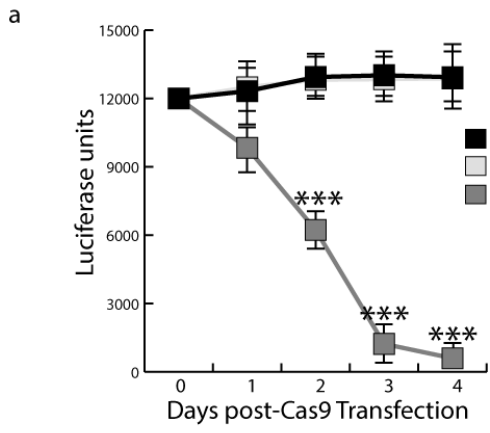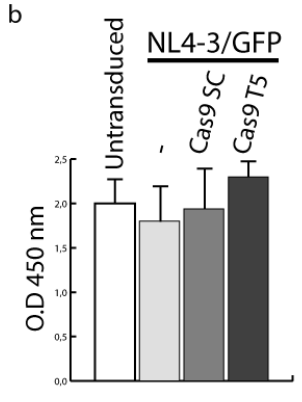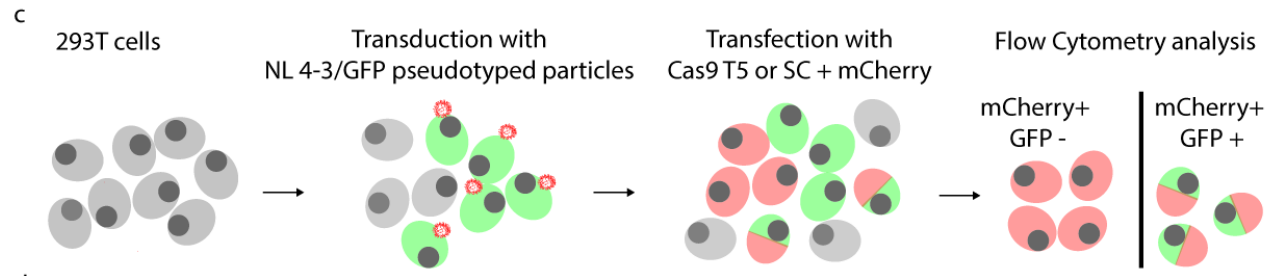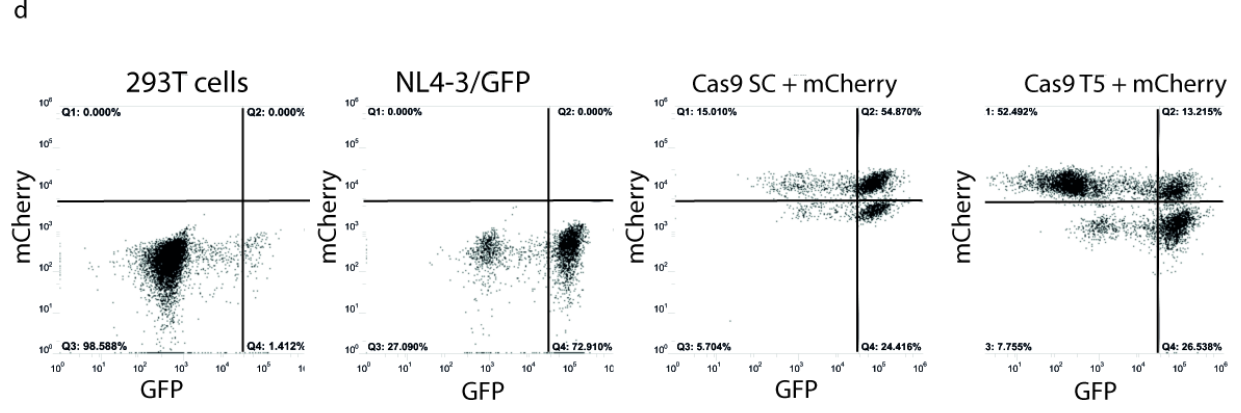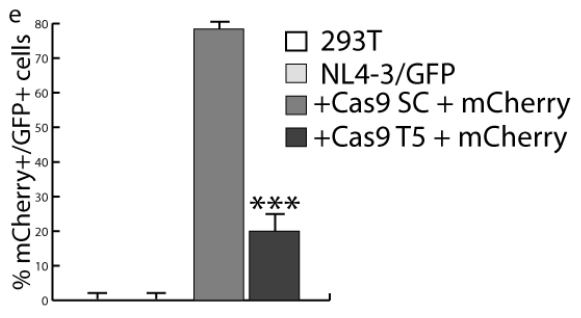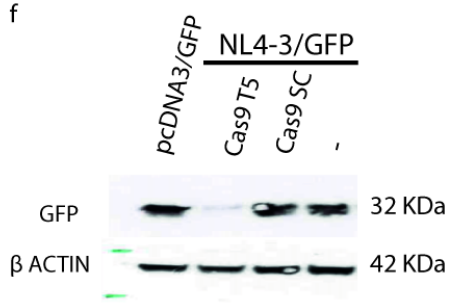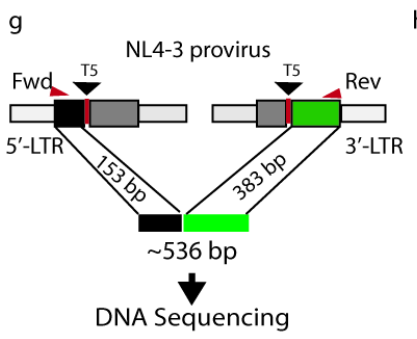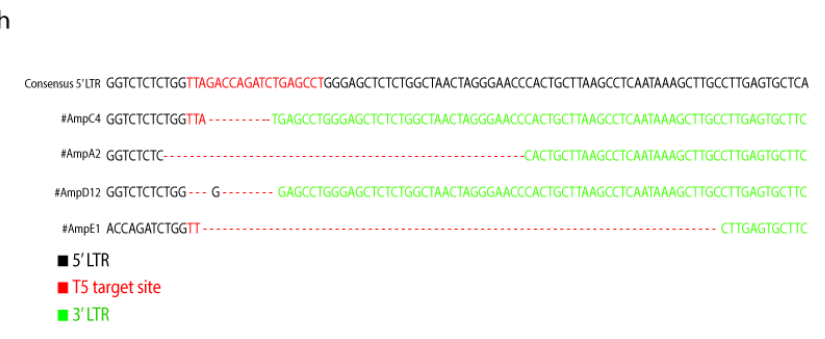



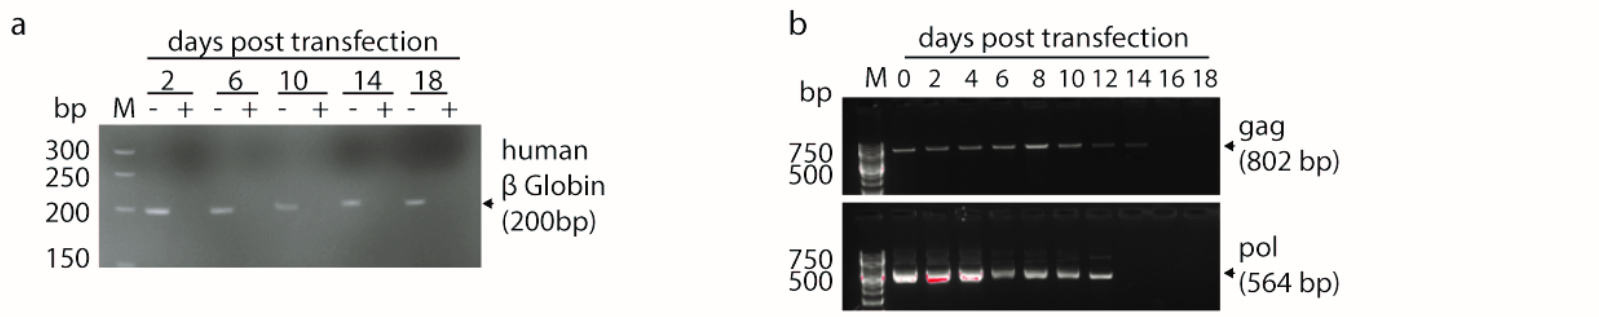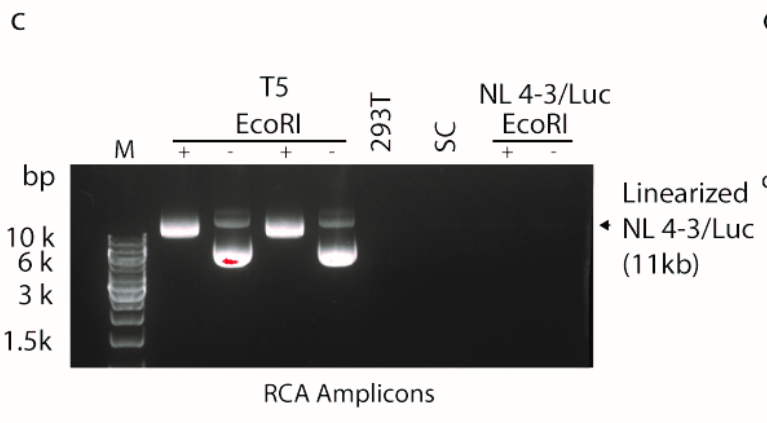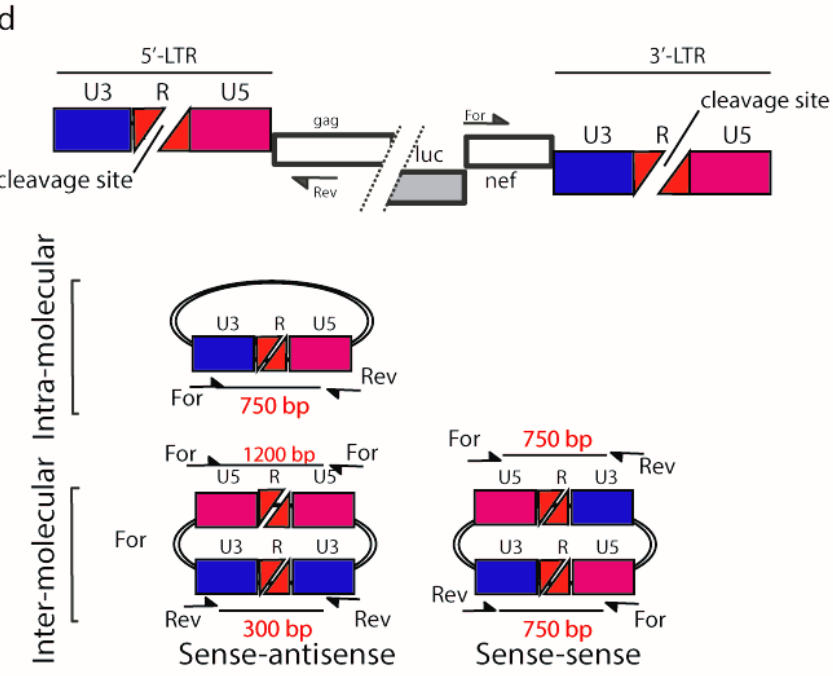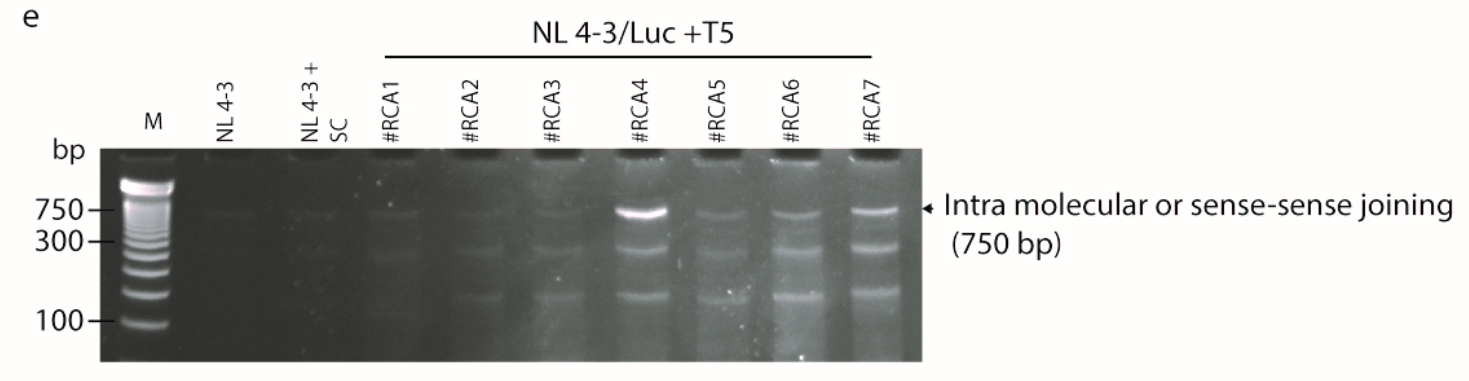

**f**

5' LTR

WT AGACCAGATCTGAGCCTGGGAGCTCTCTGGCTAACTAGGGAACCCACTGCTTAAGCCTCAATAAAGCTTGCCTTGAGTG

#1 AGACCAGATCTGAGCCTGGGAGCTCTCTGGCTAACTAGGGAACCCACTGCTTAAGCCTCAATAAAGCTTGCCTTGAGTG

#2 -----TCAGAGCC TGGGAGCTCTCTGGCTAACTAGGGAACCCACTGCTTAAGCCTCAATAAAGCTTGCCTTGAGTG

#3 TAACCAGATCTGAGCC TGGGAGCTCTCTGGCTAACTAGGGAACCCACTGCTTAAGCCTCAATAAAGCTTGCCTTGAGTG

#4 AGA-----CTCTCTGGCTAACTAGGGAACCCACTGCTTAAGCCTCAATAAAGCTTGCCTTGAGTG

#5 A-----CTTAAGCCTCAATAAAGCTTGCCTTGAGTG

#6 AGACCAATCTGAGCC TGGGAGCACTCTGGCTAACTAGGGAACCCACTGCTTAAGCCTCAATAAAGCTTGCCTTGAGTG

#7 AGTCCAGAGCTGAGCC TGGGAGCTCTCTGGCTAACTAGGGAACCCACTGCTTAAGCCTCAATAAAGCTTGCCTTGAGTG

5' LTR (black box)      T5 site (red box)      Mismatch (cyan box)

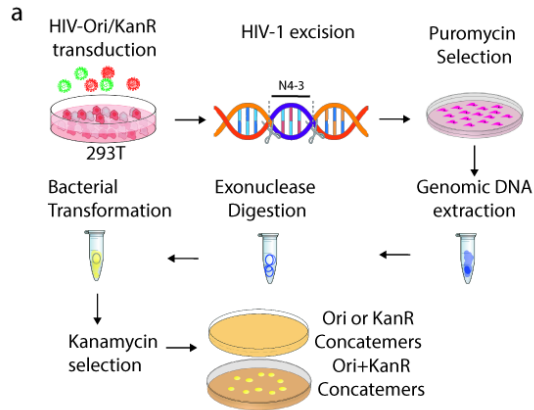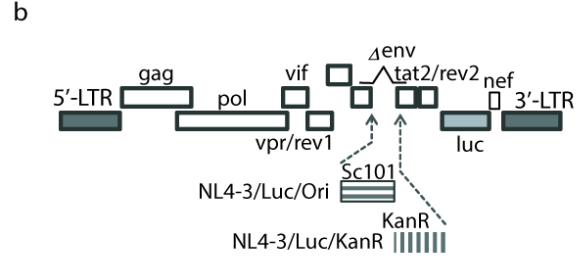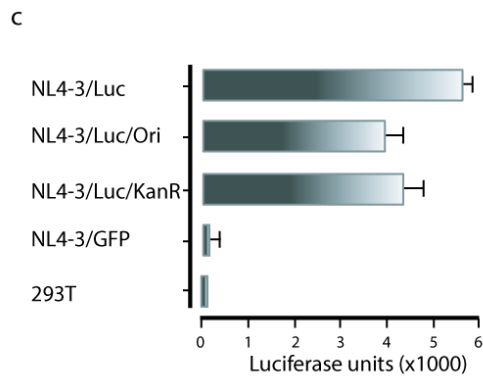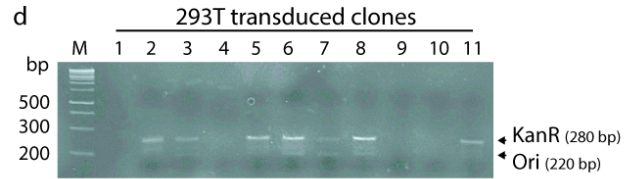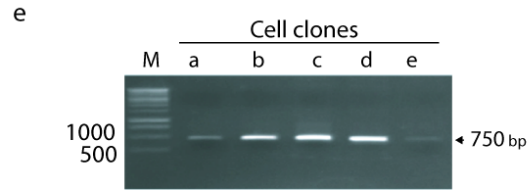

**f**

NL4-3 CCCTGGAAAGTCCCAGCGAAAGTCCCTTGTAGCAAGCTCGAT  
 NL4-3/Luc/Ori CCCTGGAAAGTCCCAGCGAAAGTCCCTTGTAGCAAGCTCGAT  
 NL4-3/Luc/KanR CCCTGGAAAGTCCCAGCGAAAGTCCCTTGTAGCAAGCTCGAT

NL4-3/Luc/KanR Ori clones

a CCCTGGAAAGTCCCAGCG-----AGCTCGAT  
 b CCCTGGAAAGTCCCAGCG-----  
 c CCCTGGAAAGTCCCAGCGAAAGTCCCTT-TAGCAAGCTCGAT  
 d CCCTGGAAAGTCCCAGCGAAAGTCCCTTGTAGCAAGCTCGAT

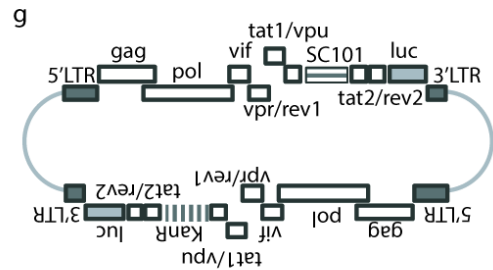

**a**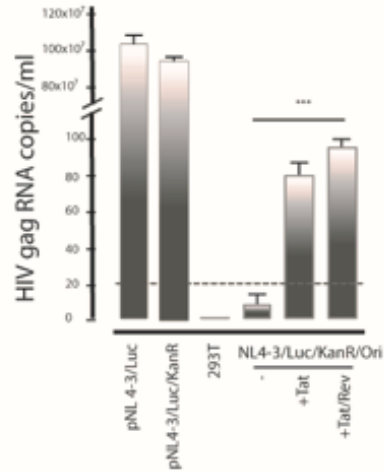**b**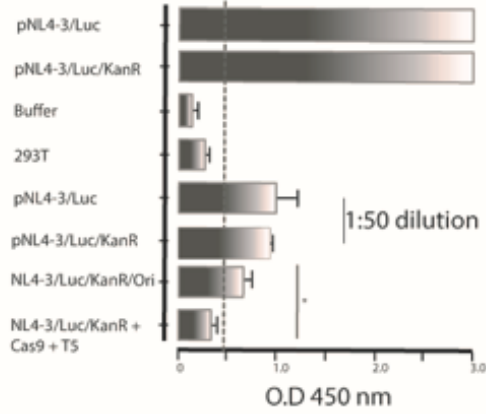**c**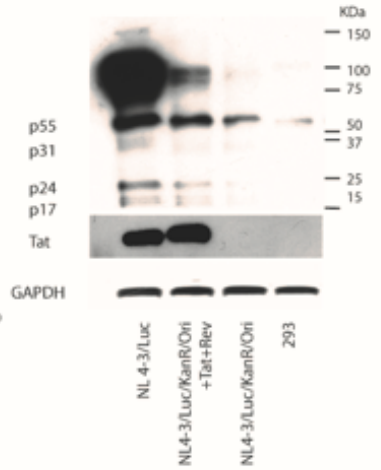**d**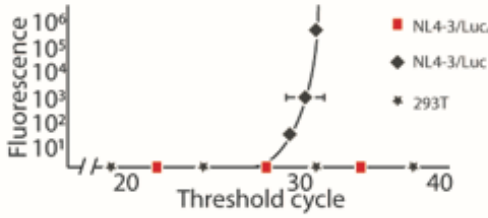**e**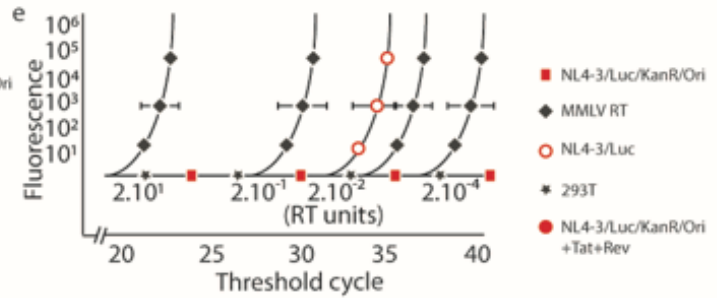**f**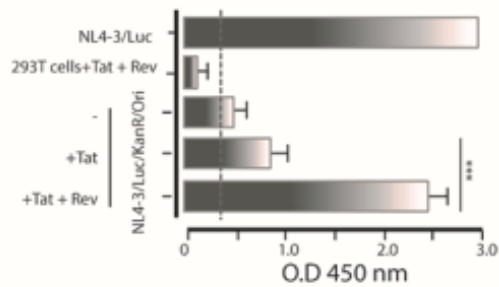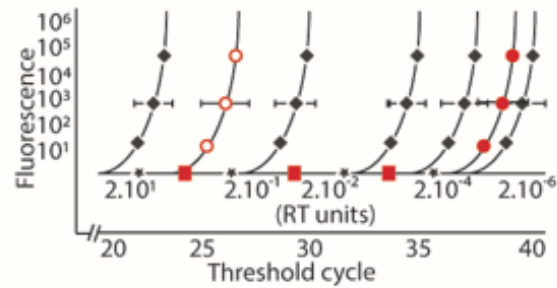**g**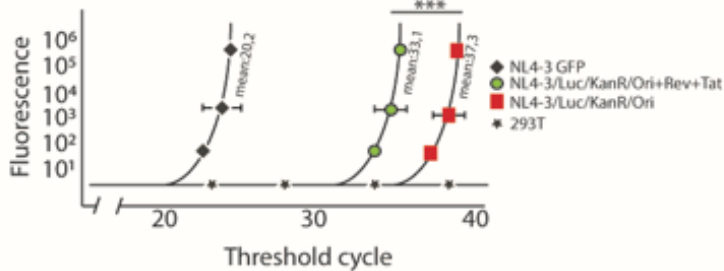

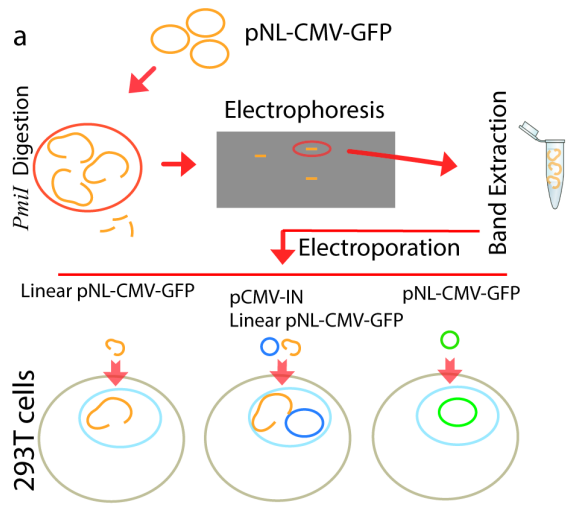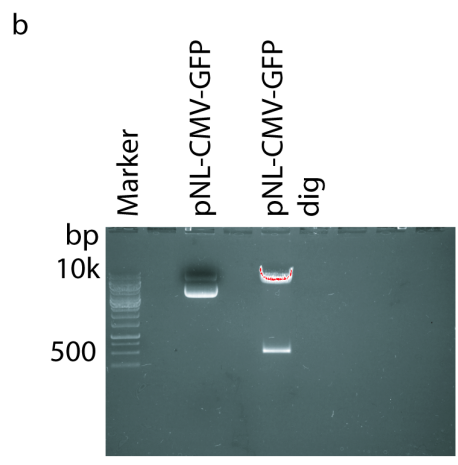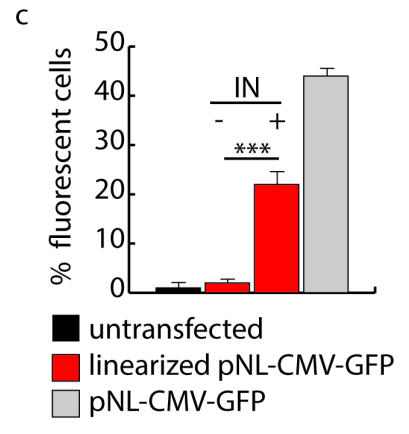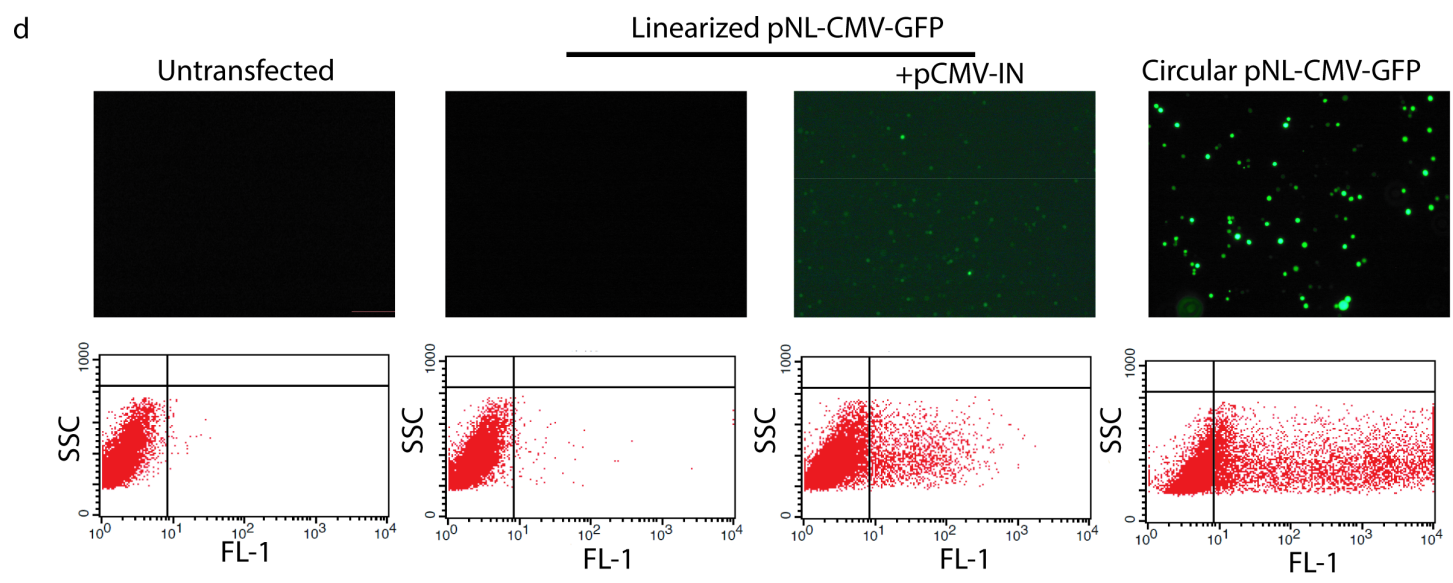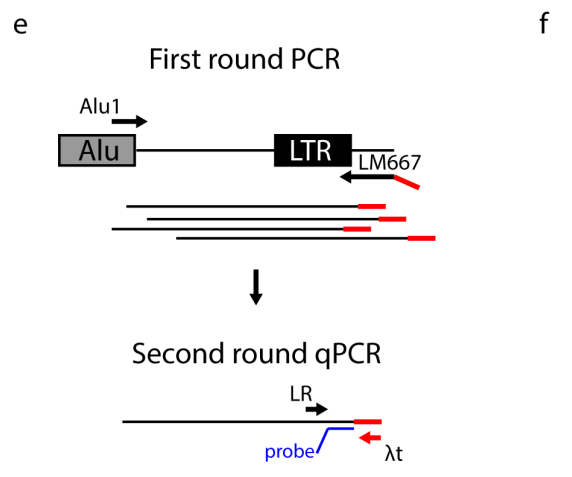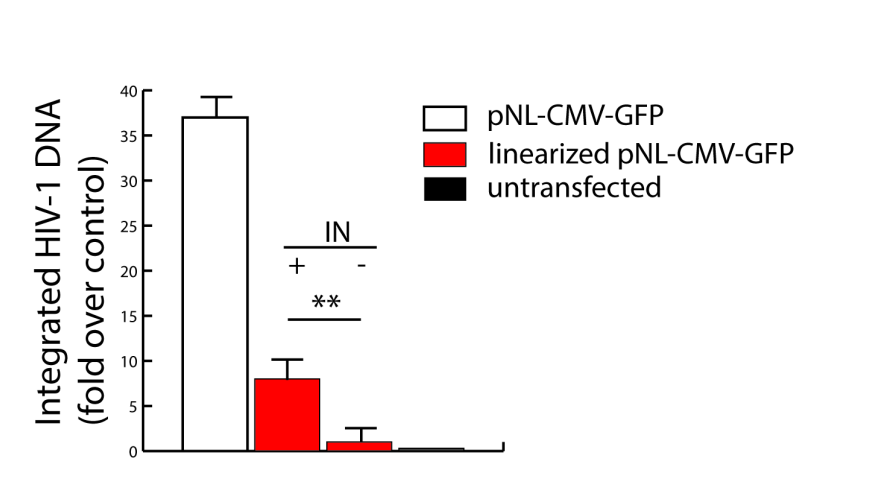

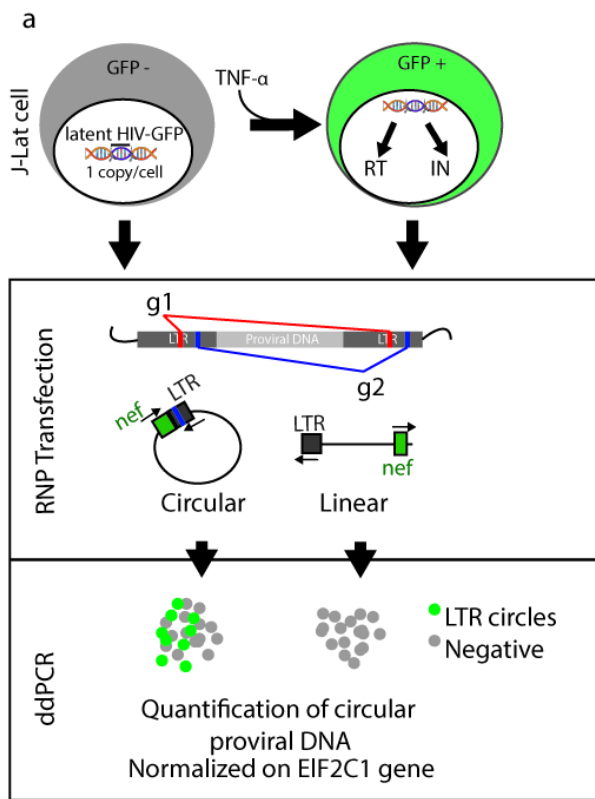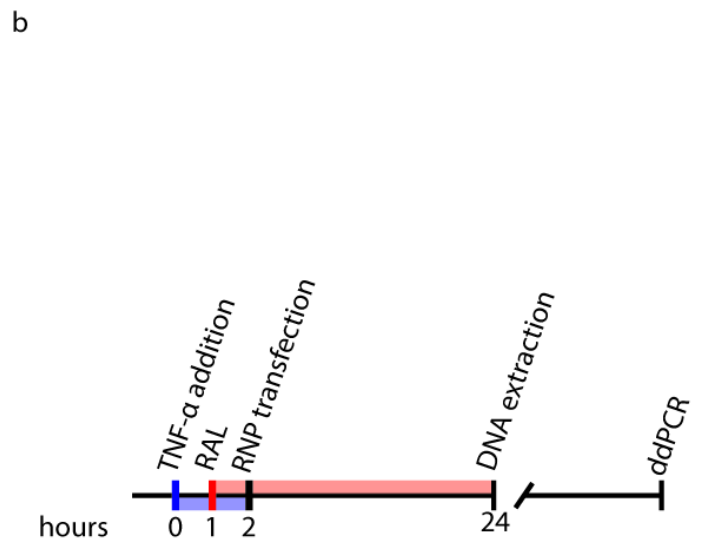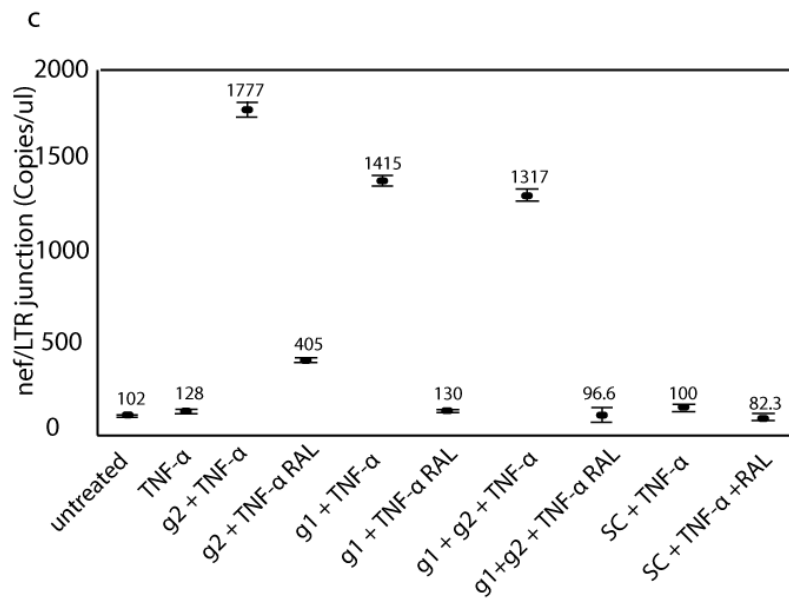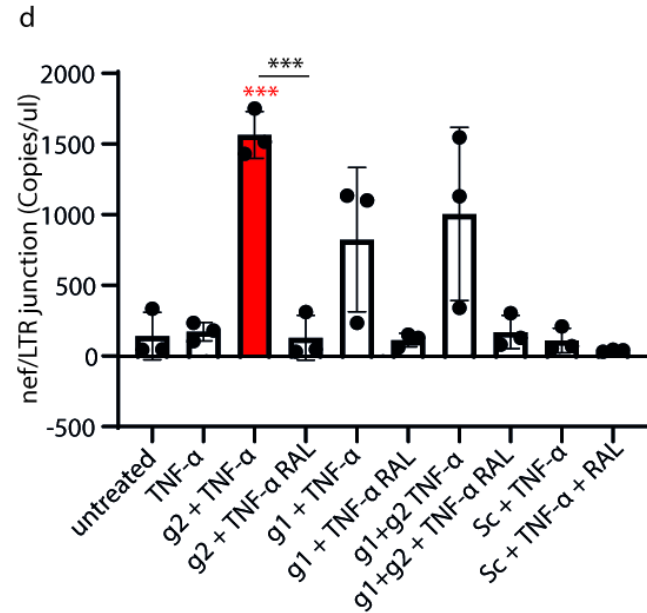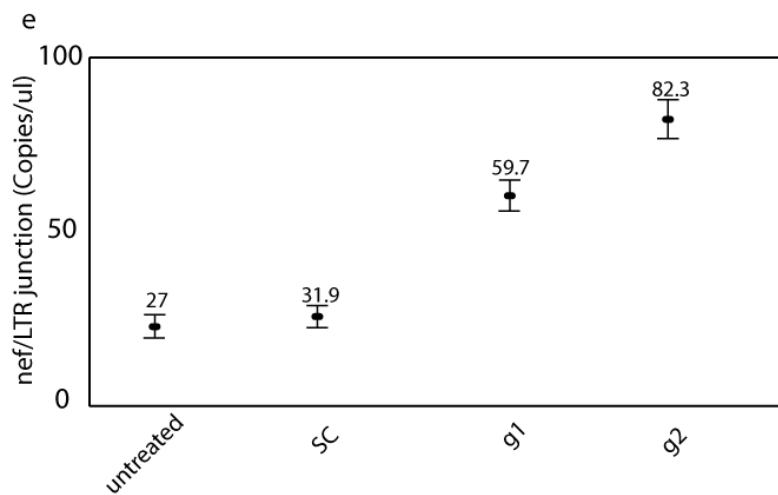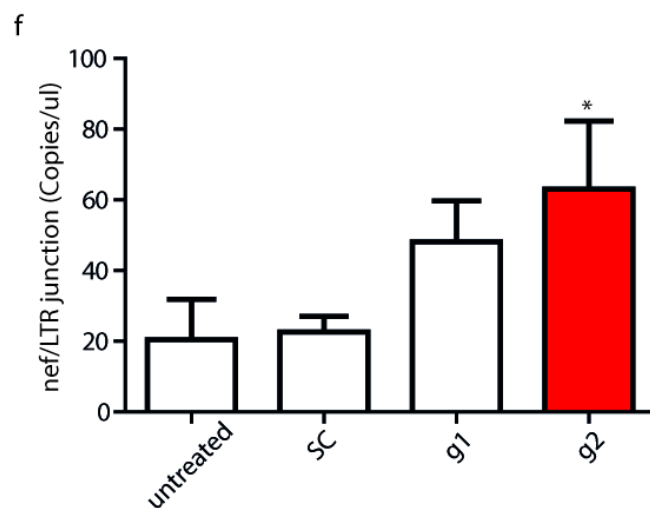

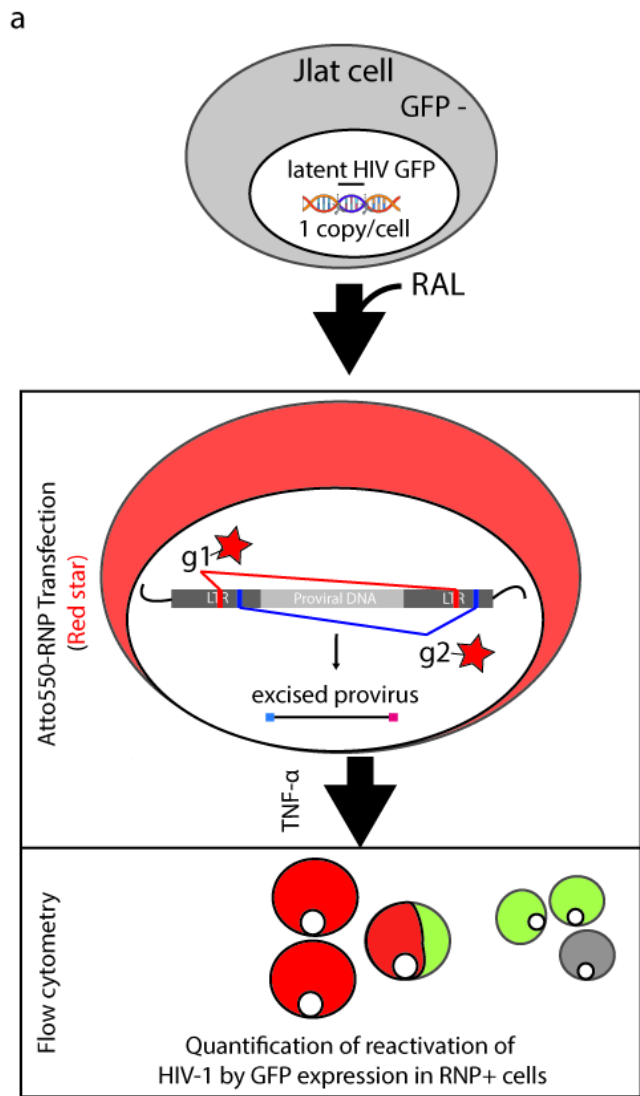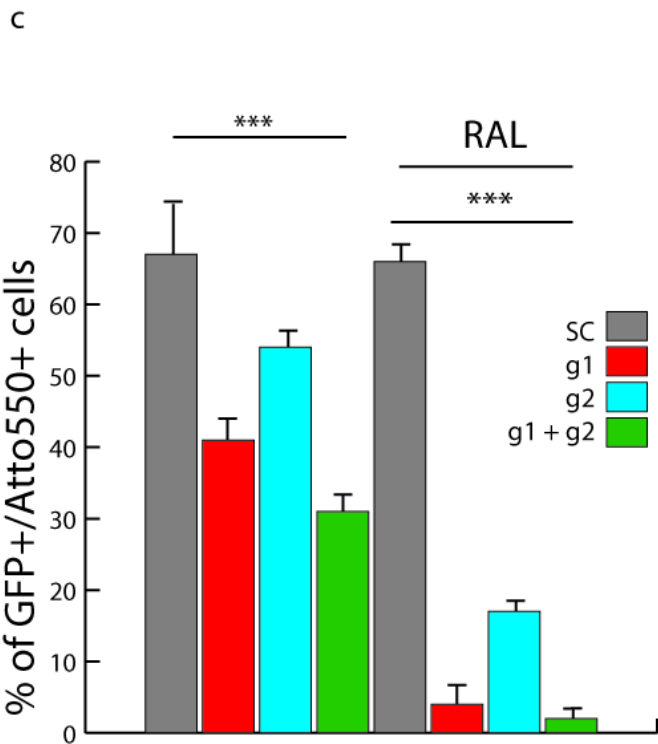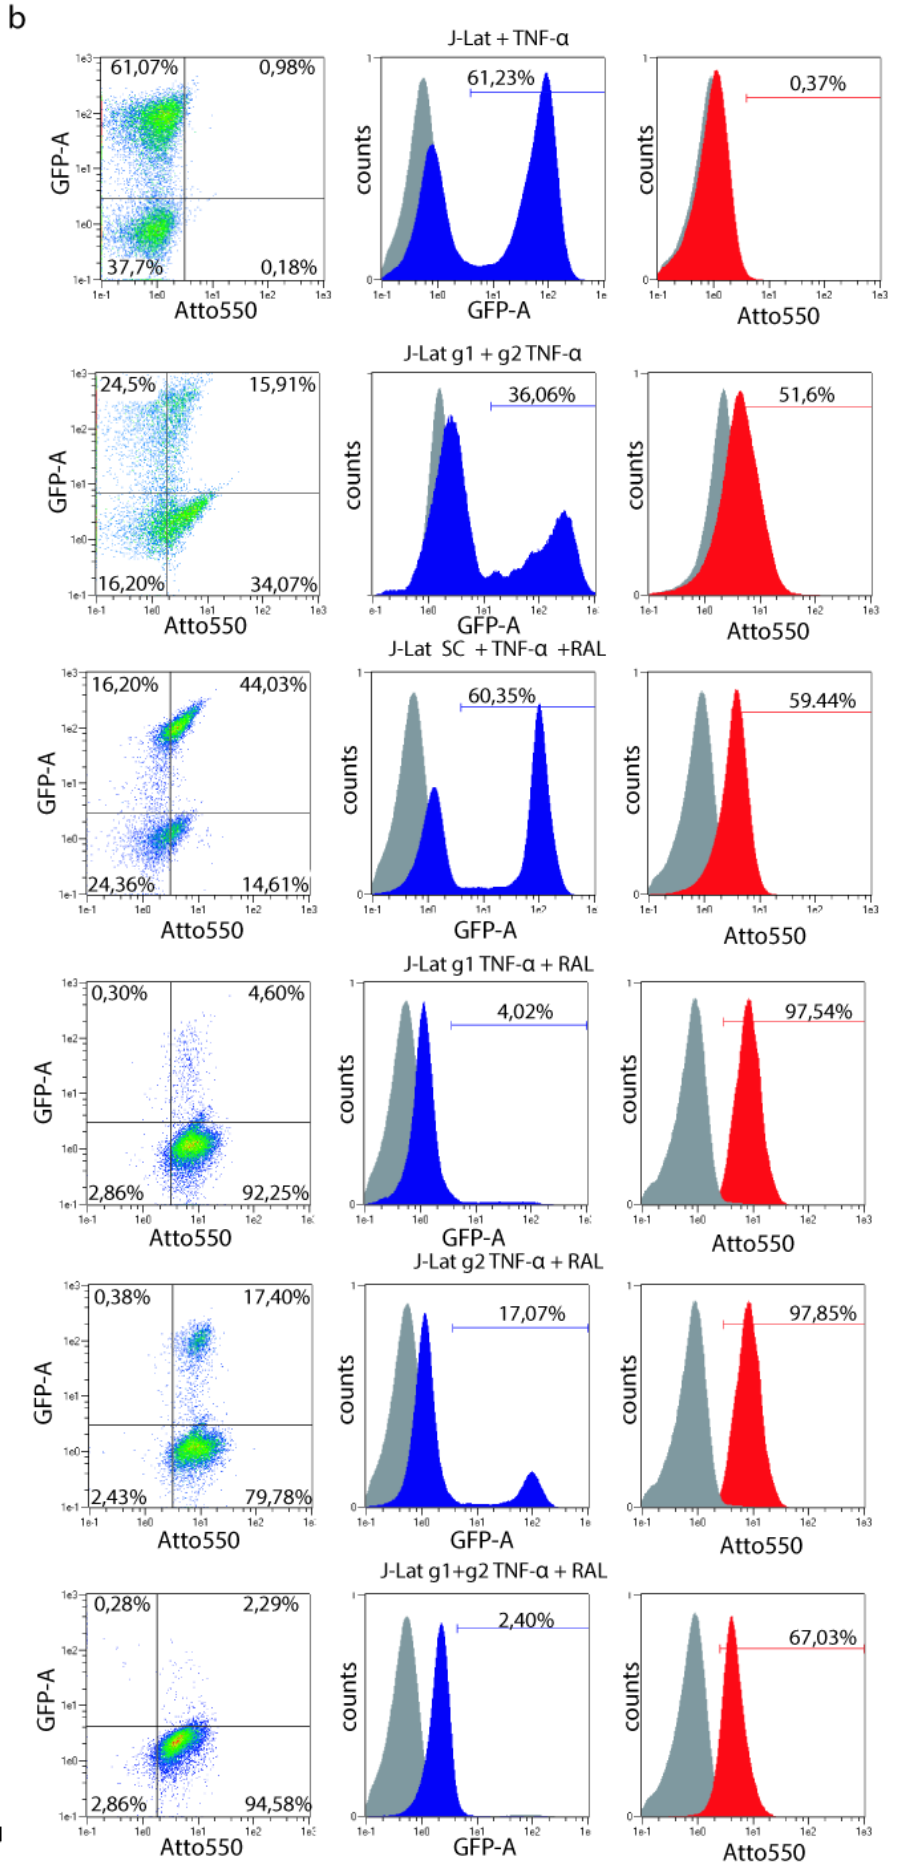

a

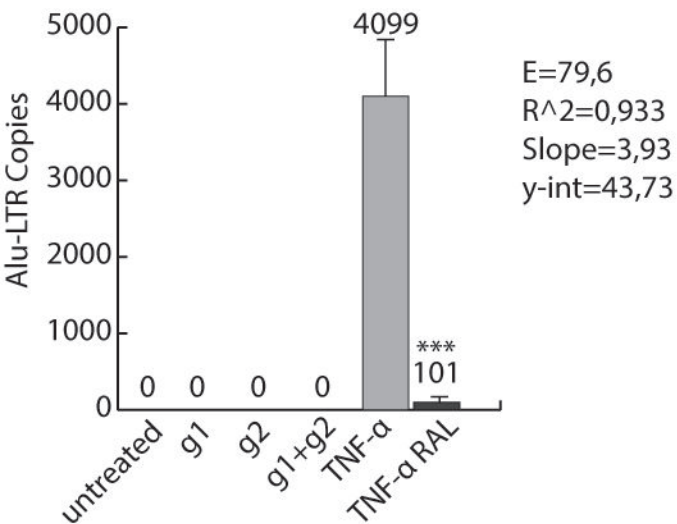

b

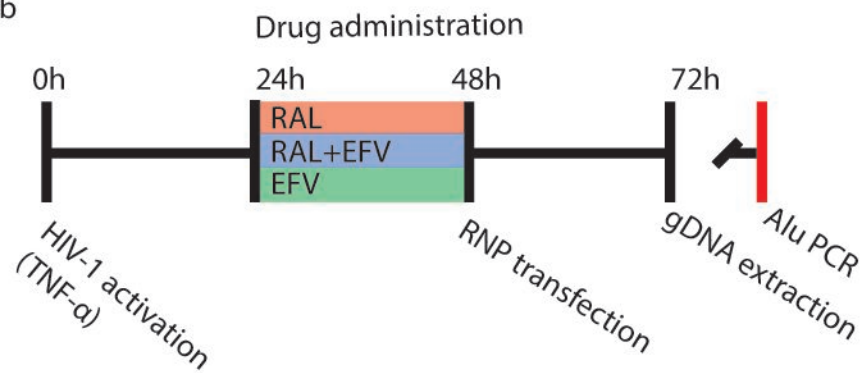

c

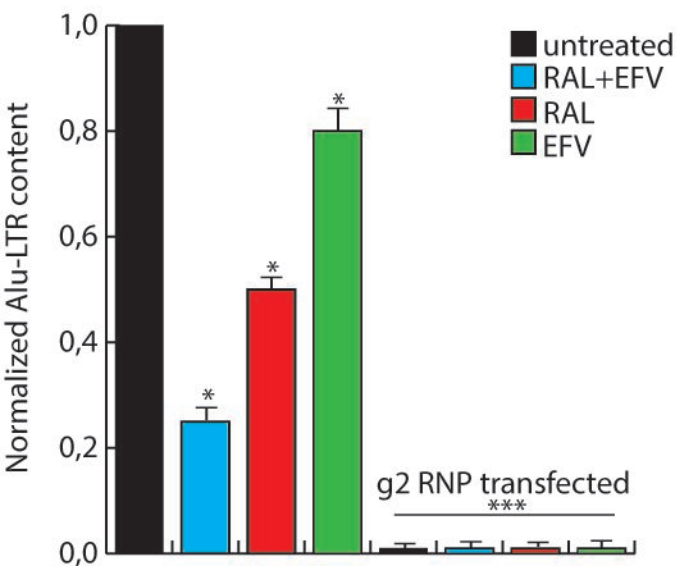

d

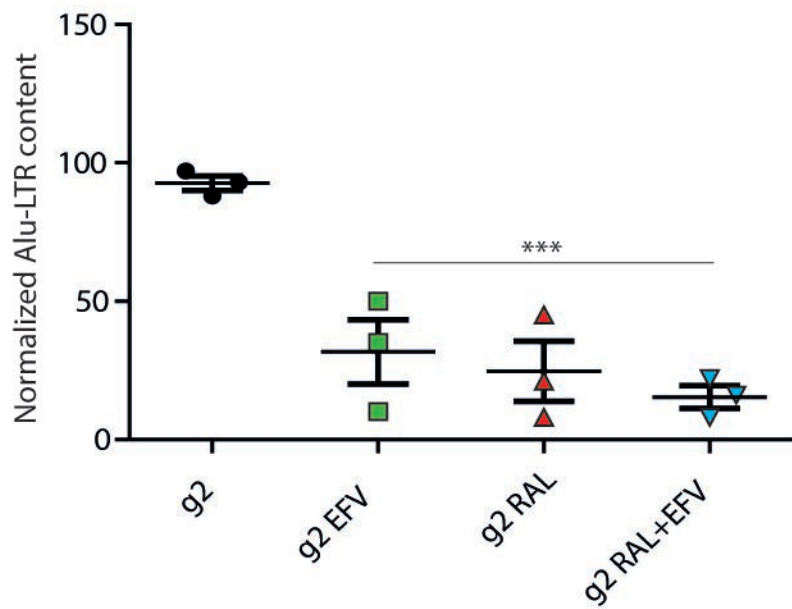

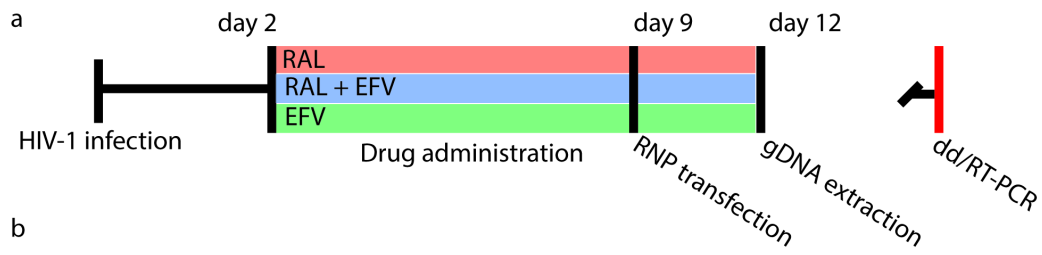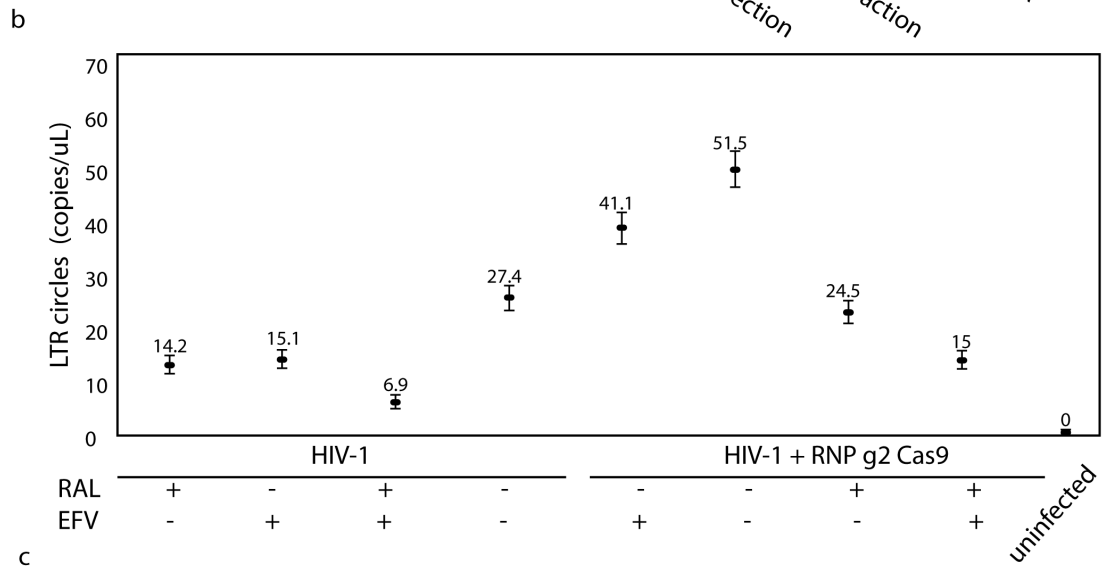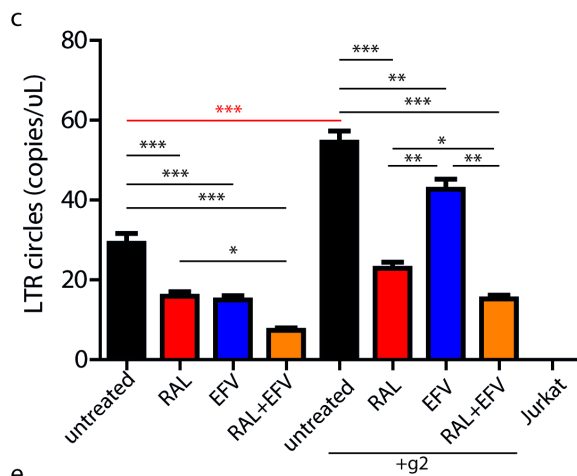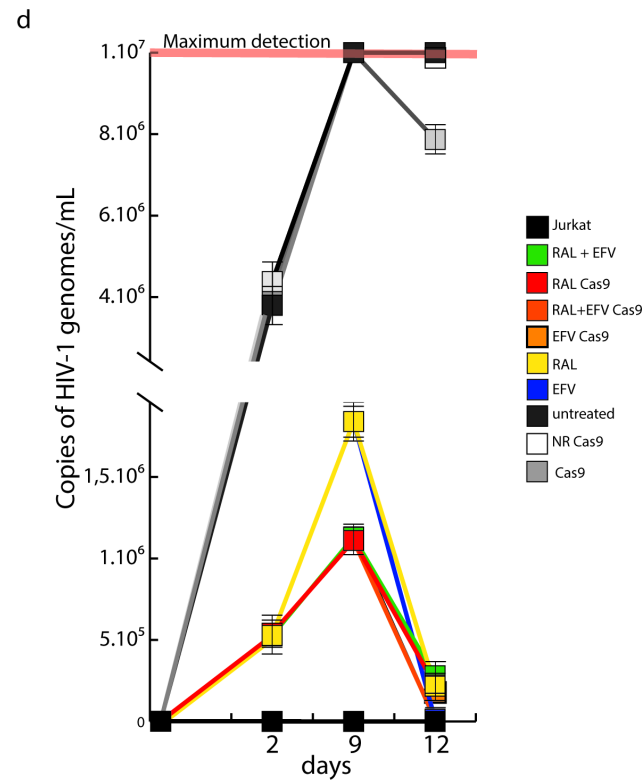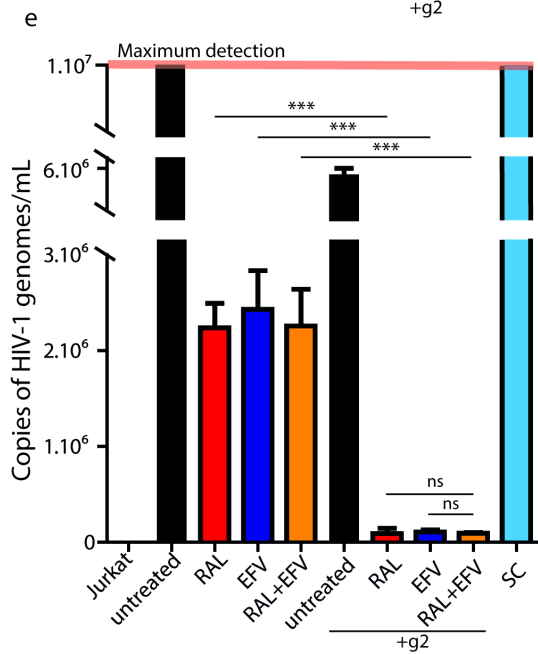

Source: http://biorxiv.org/content/10.1101/2020.11.16.384180v1.full.pdf
